# Supplementary material
Source: HighWire-hosted journal article supplement (https://www.annals.org/content/suppl/2009/01/05/0000605-200901200-00101)
Supplement: Shamliyan_AT1_150-2-DC1-A1.pdf [file Shamliyan_AT1_150-2-DC1-A1.pdf]

*Appendix Table 1. Effects of Drug Therapies for Chronic Hepatitis B on Nonclinical Intermediate Outcomes*

| Active Treatment vs. Control (Reference)                                          | Treatment Duration/ Follow-up Off Therapy, wk/wk | Studies/ Participants Enrolled, n/n | Estimates (95% CI); Dose Response Heterogeneity; P Value/ I <sup>2</sup> (%) | Level of Evidence/ Comments                              | Study Quality                                                                                                                                                              |
|-----------------------------------------------------------------------------------|--------------------------------------------------|-------------------------------------|------------------------------------------------------------------------------|----------------------------------------------------------|----------------------------------------------------------------------------------------------------------------------------------------------------------------------------|
| <b>A. Combined outcomes</b>                                                       |                                                  |                                     |                                                                              |                                                          |                                                                                                                                                                            |
| <b>Combined outcomes (virologic, histologic, biochemical) at end of treatment</b> |                                                  |                                     |                                                                              |                                                          |                                                                                                                                                                            |
| Interferon- $\alpha$ 2b + prednisone vs. no treatment (38)                        | 24/0                                             | 1/ 87                               | Absolute risk difference (RD) 0.29 (0.13 to 0.46)                            | Low. Negative HBV DNA and HBeAg                          | Allocation concealment: unclear; partially double-blinded; pathologist-blinded; intention-to-treat analyses: yes; attrition bias: yes; funding: government, pharmaceutical |
| Interferon- $\alpha$ 2b vs. no treatment (38)                                     | 24/0                                             | 1/84                                | RD, 0.30 (0.13 to 0.46) 35 MU/wk); RD, 0.10 (-0.04 to 0.24); 7 MU/wk)        | Low. Negative HBV DNA and HBeAg after 35 but not 7 MU/wk | Allocation concealment: unclear; partially double-blinded; pathologist-blinded; intention-to-treat analyses: yes; attrition bias: yes; funding: government, pharmaceutical |
| Lamivudine vs. placebo (60)                                                       | 96/0                                             | 1/136                               | RD, 0.46 (0.32 to 0.59)                                                      | Low. Negative HBV DNA, normal ALT                        | Allocation concealment: unclear; double-blinded, pathologist-blinded, intention-to-treat analyses: yes; attrition bias: no; funding: pharmaceutical                        |
| Interferon- $\alpha$ 2b vs. no treatment (34, 54)                                 | 16-96/0                                          | 2/92                                | RD, 0.36 (0.20 to 0.51) 0.47/0%                                              | Low. Negative HBV DNA and normal ALT                     | Allocation concealment: unclear; open-label, intention-to-treat analyses: yes; attrition bias: yes; funding: not reported (36), private (56)                               |
| Entecavir vs. lamivudine (47)                                                     | 52-96/0                                          | 2/1418                              | RD, 0.03 (-0.01 to 0.08) 0.49/0%                                             | Moderate. Negative HBV DNA and HBeAg                     | Allocation concealment: unclear; double-blinded, intention-to-treat analyses: yes; attrition bias: yes; funding: pharmaceutical                                            |
| Interferon- $\alpha$ 2b + lamivudine vs. lamivudine (59)                          | 52/0                                             | 1/75                                | RD, 0.13 (-0.05 to 0.31)                                                     | Low. Loss of HBV DNA + HBeAg seroconversion + HBeAg loss | Allocation concealment: unclear; open-label, intention-to-treat analyses: ongoing attrition bias: no; withdrawals reported funding: not reported                           |
| Lamivudine vs. telbivudine (58)                                                   | 52/0                                             | 1/63                                | RD, -0.06 (-0.30 to 0.19)                                                    | Low. Loss of HBV DNA + HBeAg loss                        | Allocation concealment: unclear; double-blinded, intention-to-treat                                                                                                        |

|                                                                                     |       |        |                                     |                                                          |  |                                                                                                                                                                     |
|-------------------------------------------------------------------------------------|-------|--------|-------------------------------------|----------------------------------------------------------|--|---------------------------------------------------------------------------------------------------------------------------------------------------------------------|
|                                                                                     |       |        |                                     |                                                          |  | analyses: yes; attrition bias: yes; funding: pharmaceutical                                                                                                         |
| Pegylated interferon- $\alpha$ 2b + lamivudine vs. lamivudine (78)                  | 60/0  | 1/100  | RD, 0.32 (0.14 to 0.50)             | Low. Loss of HBV DNA +HBsAg seroconversion               |  | Allocation concealment: adequate; open-label, pathologist-blinded, intention-to-treat analyses: yes (1 dose required); attrition bias: yes; funding: pharmaceutical |
| Telbivudine + lamivudine vs. lamivudine (58)                                        | 52/0  | 1/60   | RD, -0.07 (-0.30 to 0.16)           | Low. Loss of HBV DNA and HBeAg                           |  | Allocation concealment: unclear; double-blinded, intention-to-treat analyses: yes; attrition bias: yes; funding: pharmaceutical                                     |
| Telbivudine + lamivudine vs. telbivudine (58)                                       | 52/0  | 1/85   | RD, -0.12 (-0.31 to 0.06)           | Low. Loss of HBV DNA and HBeAg                           |  | Allocation concealment: unclear; double-blinded, intention-to-treat analyses: yes; attrition bias: yes; funding: pharmaceutical                                     |
| Entecavir vs. lamivudine (44, 47)                                                   | 52-96 | 2/1418 | RD, 0.03 (-0.01 to 0.08)<br>0.49/0% | High. Negative HBV DNA and HBeAg                         |  | Allocation concealment: unclear; double-blinded, intention-to-treat analyses: yes; attrition bias: yes; funding: pharmaceutical                                     |
| Interferon- $\alpha$ 2b, 5 MU/d vs. interferon- $\alpha$ 2b, 1 MU/d (38)            | 24/0  | 1/82   | RD, 0.20 (0.01 to 0.38)             | Low. HBV DNA and HBeAg loss                              |  | Allocation concealment: unclear; partially double-blinded, intention-to-treat analyses: yes; attrition bias: yes; funding: government, pharmaceutical               |
| Interferon- $\alpha$ 2b + lamivudine vs. lamivudine (59)                            | 52/0  | 1/75   | RD, 0.13 (-0.05 to 0.31)            | Low. Loss of HBV DNA + HBeAg seroconversion + HBeAg loss |  | Allocation concealment: adequate; open-label, pathologist-blinded, intention-to-treat analyses: yes; attrition bias: yes; funding: not reported                     |
| Interferon- $\alpha$ 2b, 5 MU/d + prednisolone; interferon- $\alpha$ 2b, 1MU/d (38) | 24/0  | 1/85   | RD, 0.19 (0.01 to 0.38)             | Low. Loss of HBV DNA + HBeAg loss                        |  | Allocation concealment: unclear; partially double-blinded, intention-to-treat analyses: yes; attrition bias: yes; funding: government, pharmaceutical               |
| Lamivudine vs. telbivudine (58)                                                     | 52/0  | 1/63   | RD, -0.06 (-0.30 to 0.19)           | Low. Loss of HBV DNA + HBeAg loss                        |  | Allocation concealment: unclear; double-blinded, intention-to-treat analyses: yes; attrition bias: yes; funding: pharmaceutical                                     |
| Pegylated interferon $\alpha$ 2b + lamivudine vs. lamivudine                        | 60/0  | 1/100  | RD, 0.32 (0.14 to 0.50)             | Low. Loss of HBV DNA + HBsAg                             |  | Allocation concealment: adequate; open-label, intention-to-treat analyses:                                                                                          |

(78)

|                                               |      |      |                           |                                                                                                   |                                                                                                                                 |
|-----------------------------------------------|------|------|---------------------------|---------------------------------------------------------------------------------------------------|---------------------------------------------------------------------------------------------------------------------------------|
| Telbivudine + lamivudine vs. lamivudine (58)  | 52/0 | 1/60 | RD, -0.07 (-0.30 to 0.16) | Low. Loss of HBV DNA and HBeAg                                                                    | seroconversion<br>yes (1 dose required); attrition bias: yes; funding: pharmaceutical                                           |
| Telbivudine + lamivudine vs. telbivudine (58) | 52/0 | 1/85 | RD, -0.12 (-0.31 to 0.06) | Low. No differences between telbivudine + lamivudine vs. telbivudine on loss of HBV DNA and HBeAg | Allocation concealment: unclear; double-blinded, intention-to-treat analyses: yes; attrition bias: yes; funding: pharmaceutical |

**Combined outcomes (virologic, histologic, biochemical) end of follow-up**

|                                                            |              |       |                                                                                               |                                                              |                                                                                                                                                                                               |
|------------------------------------------------------------|--------------|-------|-----------------------------------------------------------------------------------------------|--------------------------------------------------------------|-----------------------------------------------------------------------------------------------------------------------------------------------------------------------------------------------|
| Interferon- $\alpha$ 2b+prednisone vs. no treatment (55)   | 24/24        | 1/76  | RD, 0.00 (-0.05 to 0.05)                                                                      | Low. Sparse data (0 events). HBV DNA, HBsAg, and HBeAg loss  | Allocation concealment: unclear; blinding not stated intention-to-treat analyses: ongoing attrition bias: yes; funding: pharmaceutical and other                                              |
| Interferon- $\alpha$ 2b vs. no treatment (33, 35, 54, 55)  | 16-96/24-144 | 4/282 | RD, 0.22 (0.08 to 0.36)<br>0.042/63.4% Relative risk ratio (RR) 2.96 (1.40 to 6.25) 0.313/16% | Moderate. Negative HBV DNA + HBeAg                           | Allocation concealment: unclear (55), adequate (33, 35, 54); open-label, intention-to-treat analyses: yes; attrition bias: yes; funding: pharmaceutical and other (35, 55), not reported (33) |
| Lamivudine vs. placebo (60)                                | 96/24        | 1/136 | 0.07 (-0.08 to 0.21) (RD)                                                                     | Low. Loss of HBV DNA and HBeAg                               | Allocation concealment: unclear; double-blinded, intention-to-treat analyses: yes; attrition bias: no; funding: pharmaceutical                                                                |
| Interferon- $\alpha$ 2b vs. no treatment (56, 57)          | 16-96/24-48  | 2/116 | RD, 0.03 (-0.03 to 0.10)<br>1/0%                                                              | Moderate. Negative HBV DNA, normal ALT, HBsAg and HBeAg loss | Allocation concealment: unclear; intention-to-treat analyses: ongoing attrition bias: not reported funding: not reported                                                                      |
| Interferon- $\alpha$ 2b vs. no not reported treatment (57) | 16/40        | 1/58  | RD, 0.19 (-0.01 to 0.39)                                                                      | Low. Negative HBV DNA and HBeAg seroconversion               | Allocation concealment: unclear; intention-to-treat analyses: ongoing attrition bias: not reported funding: not reported                                                                      |

|                                                                          |              |        |                                       |                                                                                                   |                                                                                                                                                                        |
|--------------------------------------------------------------------------|--------------|--------|---------------------------------------|---------------------------------------------------------------------------------------------------|------------------------------------------------------------------------------------------------------------------------------------------------------------------------|
| Interferon- $\alpha$ 2b vs. no treatment (56)                            | 16/40        | 1/58   | RD, 0.16 (-0.04 to 0.35)              | Low. Negative HBV DNA, HBeAg loss                                                                 | Allocation concealment: unclear; intention-to-treat analyses: ongoing attrition bias: not reported funding: not reported                                               |
| Interferon- $\alpha$ 2b vs. no treatment (57)                            | 16/40        | 1/58   | RD, 0.27 (0.10 to 0.43)               | Low. Negative HBV DNA, HBeAg loss and normal ALT                                                  | Allocation concealment: unclear; intention-to-treat analyses: ongoing attrition bias: not reported funding: not reported                                               |
| Interferon- $\alpha$ 2b vs. no treatment (34, 54)                        | 16-96/40-144 | 2/92   | RD, 0.28 (0.14 to 0.42)<br>0.968/0%   | Low. Sparse data (small number of events) Negative HBV DNA and normal ALT                         | Allocation concealment: unclear; open-label, intention-to-treat analyses: yes; attrition bias: yes funding: not reported (34), private (54)                            |
| Entecavir vs. lamivudine (44, 46)                                        | 52-63/76-87  | 2/995  | Random differences in all comparisons | Moderate. Entecavir, 0.50 or 0.1mg vs. lamivudine did not increase rate of HBV DNA and HBeAg loss | Allocation concealment: unclear (44), adequate (46); double-blinded, intention-to-treat analyses: yes; attrition bias: yes; funding: pharmaceutical (44), unclear (46) |
| Interferon- $\alpha$ 2b + prednisone vs. interferon- $\alpha$ 2b (51,55) | 24/48        | 1/56   | RD, -0.17 (-0.42 to 0.07)             | Low. HBV DNA loss, HBeAg loss and seroconversion                                                  | Allocation concealment: unclear; blinding not stated intention-to-treat analyses: yes; attrition bias: yes; funding: pharmaceutical                                    |
| Interferon- $\alpha$ 2b + prednisone vs. interferon- $\alpha$ 2b (51,55) | 24/48        | 1/79   | RD, 0.07(-0.10 to 0.24)               | Low. HBV DNA loss, HBeAg loss and seroconversion                                                  | Allocation concealment: unclear; blinding not stated intention-to-treat analyses: yes; attrition bias: yes; funding: pharmaceutical                                    |
| Interferon- $\alpha$ 2b + lamivudine vs. lamivudine (61)                 | 52/75        | 1/75   | RD, 0.21 (0.06 to 0.35)               | Low. Loss of HBVDNA+ HBeAg seroconversion + HBeAg loss                                            | Allocation concealment: adequate; open-label, pathologist-blinded, intention-to-treat analyses: yes; attrition bias: yes; funding: not reported                        |
| Pegylated interferon- $\alpha$ 2b + lamivudine vs. lamivudine (52)       | 60/24        | 1/ 100 | RD, 0.20 (0.05 to 0.35)               | Low. Loss of HBV DNA + HBeAg loss at two time points of follow-up                                 | Allocation concealment: adequate; open-label, intention-to-treat analyses: yes (1 dose required); attrition bias: yes; funding: pharmaceutical                         |
| Pegylated interferon- $\alpha$ 2b + lamivudine vs. lamivudine (52)       | 60/40        | 1/100  | RD, 0.12 (-0.01 to 0.25)              | Low. Loss of HBV DNA + HBeAg loss at two time points of follow-up                                 | Allocation concealment: adequate; open-label, intention-to-treat analyses: yes (1 dose required); attrition bias: yes; funding: pharmaceutical                         |

|                                                                    |         |        |                                                                                             |                                                                   |                                                                                                                                                                                  |
|--------------------------------------------------------------------|---------|--------|---------------------------------------------------------------------------------------------|-------------------------------------------------------------------|----------------------------------------------------------------------------------------------------------------------------------------------------------------------------------|
| Pegylated interferon- $\alpha$ 2b + lamivudine vs. lamivudine (52) | 60/57   | 1/100  | RD, 0.20 (0.05 to 0.35)                                                                     | Low. Loss of HBV DNA + HBeAg loss at two time points of follow-up | Allocation concealment: adequate; open-label, intention-to-treat analyses: yes (1 dose required); attrition bias: yes; funding: pharmaceutical                                   |
| Adefovir vs. placebo (65, 74)                                      | 48-52/0 | 2/995  | RD, 0.11 (0.06 to 0.16)*<br>0.122/48.2%; no significant dose response                       | Moderate                                                          | Allocation concealment: unclear (65) adequate (74); double-blinded: yes; intention-to-treat analyses: yes; attrition bias: yes; funding: pharmaceutical                          |
| Adefovir + lamivudine vs. adefovir (72)                            | 48/0    | 1/39   | RD, -0.01 (-0.23 to 0.22)                                                                   | Low. Sparse data (small N of events)                              | Allocation concealment: unclear; double-blinded, intention-to-treat analyses: yes (1 dose required); attrition bias: yes; funding: not reported                                  |
| Adefovir vs. adefovir then telbivudine (76)                        | 52/0    | 1/91   | RD, -0.06 (-0.23 to 0.11)                                                                   | Low                                                               | Allocation concealment: adequate; open-label, intention-to-treat analyses: no; attrition bias: yes; funding: pharmaceutical                                                      |
| Adefovir + lamivudine vs. lamivudine (71, 72)                      | 48-52/0 | 2/134  | RD, 0.12 (0.03 to 0.21)*<br>0.699/0%                                                        | Moderate                                                          | Allocation concealment: unclear; double-blinded, intention-to-treat analyses: yes; attrition bias: yes; funding: not reported                                                    |
| Adefovir (10 vs. 30 mg) (65)                                       | 48/0    | 1/344  | RD, -0.01 (-0.11 to 0.08); no significant dose response                                     | Low                                                               | Allocation concealment: unclear; double-blinded: yes; intention-to-treat analyses: yes; attrition bias: yes; funding: pharmaceutical                                             |
| Adefovir (40 vs. 52 wk) (74)                                       | 40-52/0 | 1/360  | RD, 0.08 (-0.01 to 0.16)                                                                    | Low                                                               | Allocation concealment: adequate; double-blinded, intention-to-treat analyses: yes; attrition bias: yes; funding: pharmaceutical                                                 |
| Entecavir (70)                                                     | 24/0    | 1/76   | NS differences for all comparisons. No dose response when 0.01; 0.1; or 0.5 g were compared | Low. Sparse data (small N of events)                              | Allocation concealment: adequate; double-blinded, intention-to-treat analyses: no; attrition bias: yes; funding: several authors noted as receiving support from pharmaceutical. |
| Entecavir vs. lamivudine (44, 46, 70)                              | 24-63/0 | 3/1112 | RD, 0.03 (-0.03 to 0.08)<br>0.13/46.9%                                                      | Low                                                               | Allocation concealment: unclear (44), adequate (46, 70); double-blinded, intention-to-treat analyses: yes (44, 46),                                                              |

|                                                                                       |         |       |                                    |          |                                                                                                                                                                                                                                 |
|---------------------------------------------------------------------------------------|---------|-------|------------------------------------|----------|---------------------------------------------------------------------------------------------------------------------------------------------------------------------------------------------------------------------------------|
|                                                                                       |         |       |                                    |          | no (70); attrition bias: yes; funding: pharmaceutical (44), unclear (46), several authors noted as receiving support from pharmaceutical (70)                                                                                   |
| Interferon- $\alpha$ 2b + corticosteroid vs. interferon- $\alpha$ 2b (37, 39)         | 16-24/0 | 2/77  | NS differences for all comparisons | Low      | Allocation concealment: unclear (37), adequate (39); open-label (37), unclear although study placebo-controlled (39) intention-to-treat analyses: yes (37), no (39); attrition bias: yes (37), no (39); funding: pharmaceutical |
| Interferon- $\alpha$ 2b + lamivudine vs. interferon- $\alpha$ 2b (79)                 | 24/0    | 1/144 | RD, 0.00 (-0.12 to 0.12)           | Low      | Allocation concealment: adequate; blinded, $\leq$ wk 8 pathologist-blinded, intention-to-treat analyses: yes; attrition bias: yes; funding: pharmaceutical                                                                      |
| Interferon- $\alpha$ 2b + lamivudine vs. interferon- $\alpha$ 2b then lamivudine (99) | 16/0    | 1/20  | RD, 0.29 (-0.01 to 0.59)           | Low      | Allocation concealment: adequate; double-blinded, intention-to-treat analyses: yes; attrition bias: yes; funding: not reported                                                                                                  |
| Interferon- $\alpha$ 2b + lamivudine vs. lamivudine (59, 79, 80)                      | 24-52/0 | 3/414 | RD, -0.05 (-0.13 to 0.03) 0.499/0% | Moderate | Allocation concealment: adequate; double-blinded, (79, 80), open-label (59), intention-to-treat analyses: yes; attrition bias: yes; funding: pharmaceutical (79), pharmaceutical/government/other (80), not reported (59)       |
| Interferon- $\alpha$ 2b + lamivudine vs. placebo (80)                                 | 52/0    | 1/118 | RD, 0.08 (-0.05 to 0.21)           | Low      | Allocation concealment: yes; double-blinded until wk 8 (IFN assigned), intention-to-treat analyses: yes; attrition bias: yes; funding: pharmaceutical/ government/other                                                         |
| Interferon- $\alpha$ 2b vs. no treatment (40)                                         | 16/0    | 1/40  | RD, 0.55 (0.29 to 0.81)*           | Low      | Allocation concealment: unclear; open-label, intention-to-treat analyses: no; attrition bias: yes; funding: not reported                                                                                                        |
| Interferon- $\alpha$ 2b + placebo vs. lamivudine (79)                                 | 24-52/0 | 1/151 | RD, -0.03 (-0.15 to 0.09)          | Low      | Allocation concealment: adequate; blinded $\leq$ wk 8, intention-to-treat analyses: yes; attrition bias: yes;                                                                                                                   |

|                                                                                           |         |        |                                       |                                             |                                                                                                                                                                                                           |
|-------------------------------------------------------------------------------------------|---------|--------|---------------------------------------|---------------------------------------------|-----------------------------------------------------------------------------------------------------------------------------------------------------------------------------------------------------------|
| Interferon- $\alpha$ 2b for 48 wk vs. interferon- $\alpha$ 2b for 24 wk (32)              | 24-48/0 | 1/65   | RD, -0.14 (-0.36 to 0.07)             | Low                                         | funding: pharmaceutical<br>Allocation concealment: unclear; open-label, intention-to-treat analyses: no; attrition bias: yes; funding: not reported                                                       |
| Lamivudine vs. adefovir dipivoxil (72)                                                    | 48/0    | 1/38   | RD, -0.16 (-0.34 to 0.02)             | Low. Sparse data (0 events in active group) | Allocation concealment: unclear; double-blinded, intention-to-treat analyses: yes (1 dose required); attrition bias: yes; funding: not reported                                                           |
| Lamivudine vs. placebo (68, 80, 85, 122)                                                  | 12-52/0 | 4/1349 | RD, 0.13 (0.04 to 0.22)*<br>0.001/81% |                                             | Allocation concealment: unclear (68, 122), adequate (80); double-blinded, intention-to-treat analyses: yes (68, 80), no (125); attrition bias: yes (68, 80), no; (125) funding: pharmaceutical/government |
| Lamivudine vs. telbivudine (58)                                                           | 52/0    | 1/63   | RD, -0.08 (-0.32 to 0.16)             | Low                                         | Allocation concealment: unclear; double-blinded, intention-to-treat analyses: yes; attrition bias: yes; funding: pharmaceutical                                                                           |
| Pegylated interferon- $\alpha$ 2a + lamivudine vs. lamivudine (49)                        | 48/0    | 1/543  | RD, 0.05 (-0.02 to 0.12)              | Low                                         | Allocation concealment: unclear; partially double-blinded, intention-to-treat analyses: yes (1 dose required); attrition bias: yes; funding: pharmaceutical                                               |
| Pegylated interferon- $\alpha$ 2a + lamivudine vs. pegylated interferon- $\alpha$ 2a (49) | 48/0    | 1/542  | RD, -0.03 (-0.11 to 0.05)             | Low                                         | Allocation concealment: unclear; partially double-blinded, intention-to-treat analyses: yes (1 dose required); attrition bias: yes; funding: pharmaceutical                                               |
| Pegylated interferon-pharmaceutical $\alpha$ 2a + placebo vs. lamivudine (49)             | 48/0    | 1/543  | RD, 0.08 (0.01 to 0.16)*              | Moderate                                    | Allocation concealment: unclear; partially double-blinded, intention-to-treat analyses: yes (1 dose required); attrition bias: yes; funding: pharmaceutical                                               |
| Pegylated interferon- $\alpha$ 2b + lamivudine vs. lamivudine (50)                        | 52-60/0 | 1/100  | RD, 0.34 (0.16 to 0.52)*              | Moderate                                    | Allocation concealment: adequate; open-label, intention-to-treat analyses: yes (1 dose required); attrition bias: yes; funding: pharmaceutical                                                            |

|                                                                                           |         |       |                                    |          |                                                                                                                                 |
|-------------------------------------------------------------------------------------------|---------|-------|------------------------------------|----------|---------------------------------------------------------------------------------------------------------------------------------|
| Pegylated interferon- $\alpha$ 2b + lamivudine vs. pegylated interferon- $\alpha$ 2b (90) | 52/0    | 1/307 | RD, 0.12 (0.01 to 0.22)*           | Moderate | Allocation concealment: unclear; double-blinded, intention-to-treat analyses: yes; attrition bias: yes; funding: pharmaceutical |
| Telbivudine + lamivudine vs. lamivudine (58)                                              | 52/0    | 1/60  | RD, -0.09 (-0.32 to 0.14)          | Low      | Allocation concealment: unclear; double-blinded, intention-to-treat analyses: yes; attrition bias: yes; funding: pharmaceutical |
| Telbivudine + lamivudine vs. telbivudine (58)                                             | 52/0    | 1/85  | RD, -0.17 (-0.35 to 0.01)          | Low      | Allocation concealment: unclear; double-blinded, intention-to-treat analyses: yes; attrition bias: yes; funding: pharmaceutical |
| Telbivudine vs. adefovir dipivoxil (76)                                                   | 24-52/0 | 1/135 | NS differences for all comparisons | Low      | Allocation concealment: adequate; open-label, intention-to-treat analyses: no; attrition bias: yes; funding: pharmaceutical     |

## B. Virologic outcomes

### HBeAg loss at the end of follow-up

|                                                                                    |               |        |                                                                       |          |                                                                                                                                                                                                                                                             |
|------------------------------------------------------------------------------------|---------------|--------|-----------------------------------------------------------------------|----------|-------------------------------------------------------------------------------------------------------------------------------------------------------------------------------------------------------------------------------------------------------------|
| Interferon- $\alpha$ 2b + corticosteroid vs. interferon- $\alpha$ 2b (39,123, 124) | 16-40/24-26   | 3/122  | NS differences for all comparisons.                                   | Moderate | Allocation concealment: unclear (123, 124), adequate (39); open-label, intention-to-treat analyses: yes (126, 127), no (39); attrition bias: yes (126, 127), no (39); funding: not reported                                                                 |
| Interferon- $\alpha$ 2b + lamivudine vs. interferon- $\alpha$ 2b (79, 85)          | 24/28-40      | 2/347  | NS differences for all comparisons.                                   | Moderate | Allocation concealment: adequate; double blind intention-to-treat analyses: yes; attrition bias: yes; funding: pharmaceutical                                                                                                                               |
| Interferon- $\alpha$ 2b + lamivudine vs. lamivudine (59, 79, 80, 83, 85)           | 37-135/16-144 | 5/1167 | One RCT in 5 reported significant improvement after combined therapy. | Moderate | Allocation concealment: adequate (59, 79, 80), unclear (83); double-blinded (79, 80), open-label (59, 83), intention-to-treat analyses: yes; attrition bias: yes; funding: pharmaceutical (79), pharmaceutical/government/other (80), not reported (59, 83) |

|                                                                                           |             |       |                                                                         |          |                                                                                                                                                                                 |
|-------------------------------------------------------------------------------------------|-------------|-------|-------------------------------------------------------------------------|----------|---------------------------------------------------------------------------------------------------------------------------------------------------------------------------------|
| Interferon- $\alpha$ 2b + lamivudine vs. placebo (80, 85)                                 | 24-52/16-28 | 2/450 | RD, 0.10 (-0.04 to 0.23)<br>0.077/68%                                   | Moderate | Allocation concealment: yes; double-blinded, intention-to-treat analyses: yes; attrition bias: yes; funding: pharmaceutical/ government/ other                                  |
| Interferon- $\alpha$ 2b vs. lamivudine (79, 85)                                           | 24/28-40    | 2/625 | NS differences for all comparisons.                                     | Moderate | Allocation concealment: yes; double-blinded, intention-to-treat analyses: yes; attrition bias: yes; funding: pharmaceutical/ government/ other                                  |
| Interferon- $\alpha$ 2b vs. interferon- $\alpha$ 2b (dose, time) (32, 39)                 | 24-48/24-72 | 2/103 | NS differences for dose and duration of time comparisons.               | Moderate | Allocation concealment: unclear (32), adequate (39); open-label, intention-to-treat analyses: no; attrition bias: no; withdrawals reported (32), no (39); funding: not reported |
| Interferon- $\alpha$ 2b vs. placebo or no treatment (32, 40, 85)                          | 16-24/8-48  | 3/351 | RD, 0.28 (0.07 to 0.50)*<br>0.025/73% RR 2.52 (1.55 to 4.1)* 0.359/2.4% | Moderate | Allocation concealment: adequate (32), unclear (40); intention-to-treat analyses: yes (33), no (40); attrition bias: yes; funding: not reported                                 |
| Lamivudine vs. placebo (68, 80)                                                           | 52/16 2/318 |       | RD, 0.15 (0.05 to 0.24)*<br>0.519/0%                                    | Moderate | Allocation concealment: unclear (68), adequate (80); double-blinded, intention-to-treat analyses: yes; attrition bias: yes; funding: pharmaceutical/government                  |
| Pegylated interferon- $\alpha$ 2a + lamivudine vs. lamivudine (49)                        | 48/24       | 1/543 | RD, 0.07 (0.00 to 0.15)*                                                | Moderate | Allocation concealment: unclear; partially double-blinded, intention-to-treat analyses: yes; attrition bias: yes; funding: pharmaceutical                                       |
| Pegylated interferon- $\alpha$ 2a + lamivudine vs. pegylated interferon- $\alpha$ 2a (49) | 48/24       | 1/542 | RD, -0.05 (-0.13 to 0.03)                                               | Moderate | Allocation concealment: unclear; partially double-blinded, intention-to-treat analyses: yes; attrition bias: yes; funding: pharmaceutical                                       |
| Pegylated interferon- $\alpha$ 2a + placebo vs. lamivudine (49)                           | 48/24       | 1/543 | RD, 0.13 (0.05 to 0.20)*                                                |          | Allocation concealment: unclear; partially double-blinded, intention-to-treat analyses: yes; attrition bias: yes; funding: pharmaceutical                                       |
| Pegylated interferon- $\alpha$ 2a vs. pegylated interferon- $\alpha$ 2a (125)             | 24/24       | 1/194 | NS differences for dose and duration of time comparisons (RD)           | Low      | Allocation concealment: unclear; open-label, intention-to-treat analyses: yes; attrition bias: yes; funding:                                                                    |

|                                                                                                |         |        |                                                                                      |                                           |                                                                                                                                                                                                     |
|------------------------------------------------------------------------------------------------|---------|--------|--------------------------------------------------------------------------------------|-------------------------------------------|-----------------------------------------------------------------------------------------------------------------------------------------------------------------------------------------------------|
| Pegylated interferon- $\alpha$ 2b + lamivudine vs. pegylated interferon- $\alpha$ 2b (90, 126) | 52/26   | 2/614  | RD, -0.01 (-0.09 to 0.06)<br>0.991/0%                                                | Moderate                                  | pharmaceutical<br>Allocation concealment: unclear; double-blinded, pathologist-blinded, intention-to-treat analyses: yes; attrition bias: yes; funding: pharmaceutical                              |
| Pegylated interferon- $\alpha$ 2b vs. interferon- $\alpha$ 2b (93)                             | 24/24   | 1/230  | RD, 0.10 (0.00 to 0.21)                                                              | Low                                       | Allocation concealment: adequate; open-label, intention-to-treat analyses: yes; attrition bias: yes; funding: not reported                                                                          |
| <b>HBeAg seroconversion at the end of treatment</b>                                            |         |        |                                                                                      |                                           |                                                                                                                                                                                                     |
| Adefovir + lamivudine vs. adefovir (72)                                                        | 48/0    | 1/39   | RD, -0.06 (-0.22 to 0.11)                                                            | Low. Sparse data (small number of events) | Allocation concealment: unclear; double-blinded, intention-to-treat analyses: yes; attrition bias: yes; funding: not reported                                                                       |
| Adefovir + lamivudine vs. lamivudine (71, 72)                                                  | 48-52/0 | 2/134  | Random differences in both RCTs                                                      | Low. Sparse data (small number of events) | Allocation concealment: unclear; double-blinded, intention-to-treat analyses: yes (1 dose); attrition bias: yes; funding: not reported                                                              |
| Adefovir (dose, duration of treatment) (65, 74, 76)                                            | 48-52/0 | 3/795  | Random differences in 2 of 3 RCTs (RD). No dose response.                            | Low. Sparse data (small number of events) | Allocation concealment: unclear (65), adequate (74, 76); double-blinded (65, 74), open-label (76), intention-to-treat analyses: yes (65, 74), no (76); attrition bias: yes; funding: pharmaceutical |
| Adefovir vs. placebo (65, 74)                                                                  | 48-52/0 | 2/700  | RD, 0.05 (0.01 to 0.09)*<br>No dose response<br>0.25/28%                             | High                                      | Allocation concealment: adequate (74), unclear (65); double-blinded, intention-to-treat analyses: yes; attrition bias: yes; funding: pharmaceutical                                                 |
| Entecavir (dose response association) (70)                                                     | 24/0    | 1/177  | NS differences for all comparisons (RD) No dose response association with HBeAg loss | Low                                       | Allocation concealment: adequate; double-blinded, intention-to-treat analyses: no; attrition bias: yes; funding: several authors noted as receiving support from pharmaceutical                     |
| Entecavir vs. lamivudine (44, 46, 70)                                                          | 24-96/0 | 3/1185 | Random differences in 2 of 3 RCTs.                                                   | Moderate                                  | Allocation concealment: adequate (46, 70), unclear (44); double-blinded, intention-to-treat analyses: yes (44, 46),                                                                                 |

|                                                                       |      |       |                                      |      |                                                                                                                                                                                                                                            |
|-----------------------------------------------------------------------|------|-------|--------------------------------------|------|--------------------------------------------------------------------------------------------------------------------------------------------------------------------------------------------------------------------------------------------|
| Interferon- $\alpha$ 2b + lamivudine vs. interferon- $\alpha$ 2b (79) | 24/0 | 1/144 | RD, -0.02 (-0.11 to 0.07) (RD)       | Low  | no (70); attrition bias: yes; funding: unclear (46), pharmaceutical (44, 70)<br>Allocation concealment: adequate; blinded $\leq$ wk 8, pathologist-blinded, intention-to-treat analyses: yes; attrition bias: yes; funding: pharmaceutical |
| Interferon- $\alpha$ 2b + lamivudine vs. lamivudine (31, 59, 79, 80)  | 52/0 | 4/565 | Random differences in 3 of 4 RCTs.   | High | Allocation concealment: adequate; open-label (31, 59), double-blinded (59, 80), intention-to-treat analyses: yes; attrition bias: yes; funding: not reported (31, 59), pharmaceutical (79) pharmaceutical/government/other (80)            |
| Interferon- $\alpha$ 2b + lamivudine vs. placebo (80)                 | 52/0 | 1/119 | RD, -0.01 (-0.13 to 0.10)            | Low  | Allocation concealment: yes; double-blinded, intention-to-treat analyses: yes; attrition bias: yes; funding: pharmaceutical/government/ other                                                                                              |
| Interferon- $\alpha$ 2b + placebo vs. lamivudine (79)                 | 52/0 | 1/151 | RD, -0.05 (-0.12 to 0.02)            | Low  | Allocation concealment: adequate; blinded $\leq$ wk 8 pathologist-blinded, intention-to-treat analyses: yes; attrition bias: yes; funding: pharmaceutical                                                                                  |
| Interferon- $\alpha$ 2b (32)                                          | 24/0 | 1/65  | RD, -0.10 (-0.33 to 0.12)            | Low  | Allocation concealment: unclear; open-label, intention-to-treat analyses: not reported attrition bias: no; withdrawals reported funding: not reported                                                                                      |
| Interferon- $\alpha$ 2b vs. placebo (40)                              | 16/0 | 1/40  | NS differences for dose comparisons. | Low  | Allocation concealment: unclear; open-label, intention-to-treat analyses: no; attrition bias: yes; funding: not reported                                                                                                                   |
| Lamivudine vs. telbivudine (58)                                       | 52/0 | 1/63  | RD, -0.11 (-0.34 to 0.12)            | Low  | Allocation concealment: unclear; double-blinded, intention-to-treat analyses: yes; attrition bias: yes; funding: pharmaceutical                                                                                                            |
| Lamivudine vs. adefovir (72)                                          | 48/0 | 1/38  | RD, -0.11 (-0.27 to 0.06)            | Low  | Allocation concealment: unclear; double-blinded, intention-to-treat analyses: yes (1 dose); attrition bias: yes; funding: not reported                                                                                                     |

|                                                                                           |         |        |                                                                        |      |                                                                                                                                                                                                                                                                                       |
|-------------------------------------------------------------------------------------------|---------|--------|------------------------------------------------------------------------|------|---------------------------------------------------------------------------------------------------------------------------------------------------------------------------------------------------------------------------------------------------------------------------------------|
| Lamivudine (67)                                                                           | 48/0    | 1/285  | RD, -0.03 (-0.11 to 0.05)                                              | Low  | Allocation concealment: unclear; double-blinded, intention-to-treat analyses: yes; attrition bias: no; funding: pharmaceutical                                                                                                                                                        |
| Lamivudine vs. placebo (53, 67, 68, 80, 85, 122)                                          | 12-80/0 | 6/1638 | RD, 0.05 (0.00 to 0.10)<br>0.028/60% RR 1.69 (1.05 to 2.74)* 0.153/38% | High | Allocation concealment: adequate (53, 80), unclear (67, 68, 122); double-blinded, intention-to-treat analyses: yes (53, 67, 68, 80), no (67); attrition bias: yes (53, 68, 80), no (67, 125); funding: institution (53), pharmaceutical (67, 125), pharmaceutical/government (68, 80) |
| Pegylated interferon- $\alpha$ 2a + lamivudine vs. lamivudine (49)                        | 48/0    | 1/543  | RD, 0.03 (-0.04 to 0.10)                                               | Low  | Allocation concealment: unclear; partially double-blinded, pathologist-blinded, intention-to-treat analyses: yes (1 dose required); attrition bias: yes funding: pharmaceutical                                                                                                       |
| Pegylated interferon- $\alpha$ 2a + lamivudine vs. pegylated interferon- $\alpha$ 2a (49) | 48/0    | 1/542  | RD, -0.03 (-0.10 to 0.04)                                              | Low  | Allocation concealment: unclear; partially double-blinded, pathologist-blinded, intention-to-treat analyses: yes (1 dose required); attrition bias: yes funding: pharmaceutical                                                                                                       |
| Pegylated interferon-pharmaceutical $\alpha$ 2a + placebo vs. lamivudine (49)             | 48/0    | 1/543  | RD, 0.06 (-0.01 to 0.13)                                               | Low  | Allocation concealment: unclear; partially double-blinded, pathologist-blinded, intention-to-treat analyses: yes (1 dose required); attrition bias: yes funding: pharmaceutical                                                                                                       |
| Pegylated interferon $\alpha$ 2b + lamivudine vs. lamivudine (50)                         | 60/0    | 1/100  | RD, 0.32 (0.14 to 0.50)*                                               | Low  | Allocation concealment: adequate; open-label, intention-to-treat analyses: yes (1 dose); attrition bias: yes; funding: pharmaceutical                                                                                                                                                 |
| Pegylated interferon- $\alpha$ 2b + lamivudine vs. pegylated interferon- $\alpha$ 2b (90) | 52/0    | 1/307  | RD, 0.02 (-0.07 to 0.11)                                               | Low  | Allocation concealment: unclear; double-blinded, pathologist-blinded, intention-to-treat analyses: yes (1 dose); attrition bias: yes; funding: pharmaceutical                                                                                                                         |

|                                                                                 |             |       |                                                                                                                                                                                 |                                                                                                               |                                                                                                                                                                                                        |
|---------------------------------------------------------------------------------|-------------|-------|---------------------------------------------------------------------------------------------------------------------------------------------------------------------------------|---------------------------------------------------------------------------------------------------------------|--------------------------------------------------------------------------------------------------------------------------------------------------------------------------------------------------------|
| Telbivudine + lamivudine vs. lamivudine (58)                                    | 52/0        | 1/60  | RD, -0.06 (-0.28 to 0.15)                                                                                                                                                       | Low                                                                                                           | Allocation concealment: unclear; double-blinded, intention-to-treat analyses: yes; attrition bias: yes; funding: pharmaceutical                                                                        |
| Telbivudine + lamivudine vs. telbivudine (58)                                   | 52/0        | 1/85  | RD, -0.17 (-0.35 to 0.00)                                                                                                                                                       | Low                                                                                                           | Allocation concealment: adequate; open-label, intention-to-treat analyses: no; attrition bias: yes; funding: pharmaceutical                                                                            |
| Telbivudine vs. adefovir (76)                                                   | 24-52/0     | 1/136 | RR 6.03 (2.20 to 16.52)*                                                                                                                                                        | Low                                                                                                           | Allocation concealment: unclear; open-label, intention-to-treat analyses: yes; attrition bias: yes; funding: not reported                                                                              |
| <b>HBeAg seroconversion at time of follow-up</b>                                |             |       |                                                                                                                                                                                 |                                                                                                               |                                                                                                                                                                                                        |
| Interferon- $\alpha$ 2b + corticosteroid vs. interferon- $\alpha$ 2b (123, 124) | 24/24-26    | 2/85  | RD, 0.10 (-0.11 to 0.31) 0.792/0%                                                                                                                                               | Low                                                                                                           | Allocation concealment: unclear (81), adequate (79); open-label, intention-to-treat analyses: no (81), yes (79); attrition bias: yes; funding: not reported (81), pharmaceutical (79)                  |
| Interferon- $\alpha$ 2b + lamivudine vs. interferon- $\alpha$ 2b (79, 81, 85)   | 24-48/4-56  | 3/482 | Random difference in all comparisons. Active treatment at the longest 56 wk of follow-up in one RCT resulted in increase of 0.36 (95% CI 0.10 to 0.61)* in rate of the outcome. | Low. Limited evidence from one RCT suggest increase in HBeAg seroconversion at the longest 56 wk of follow-up | Allocation concealment: adequate; open-label (31), double blinded (79, 80), intention-to-treat analyses: yes; attrition bias: yes; funding: pharmaceutical/government/ other (80), pharmaceutical (79) |
| Interferon- $\alpha$ 2b + lamivudine vs. lamivudine (31, 79, 80)                | 24-52/16-48 | 3/490 | RD, 0.00 (-0.15 to 0.14) 0.002/84%                                                                                                                                              | Moderate. (1 of 3 RCTs reported significant increase (0.182; 95% 0.050 to 0.315)                              | Allocation concealment: yes; double-blinded, intention-to-treat analyses: yes; attrition bias: yes; funding: pharmaceutical/government/ other                                                          |
| Interferon- $\alpha$ 2b + lamivudine vs. placebo (80, 85)                       | 24-52/16-28 | 2/450 | RD, 0.05 (-0.12 to 0.22) 0.011/85%                                                                                                                                              | Low. Secondary analysis of 4 RCTs reported significant increase (0.13; 95% 0.05 to 0.21)*                     | Allocation concealment: unclear; open-label, intention-to-treat analyses: yes; attrition bias: yes; funding: pharmaceutical                                                                            |
| Interferon- $\alpha$ 2b vs. lamivudine (79, 85)                                 | 24-52/12-40 | 2/776 | Random difference in all comparisons.                                                                                                                                           | Moderate                                                                                                      | Allocation concealment: adequate; double blinded, intention-to-treat analyses: yes; attrition bias: yes; funding: pharmaceutical                                                                       |
| Interferon- $\alpha$ 2b vs. placebo                                             | 16-96/28-64 | 2/346 | RD, 0.120 (0.03 to 0.21)*                                                                                                                                                       | Moderate                                                                                                      | Allocation concealment: unclear; open-                                                                                                                                                                 |

|                                                                                           |             |       |                                                             |          |  |                                                                                                                                                                        |
|-------------------------------------------------------------------------------------------|-------------|-------|-------------------------------------------------------------|----------|--|------------------------------------------------------------------------------------------------------------------------------------------------------------------------|
| (40, 85)                                                                                  |             |       | 0.353/0%                                                    |          |  | label (40), intention-to-treat analyses: yes (85), no (40); attrition bias: yes; funding: not reported (40) pharmaceutical (85)                                        |
| Lamivudine vs. placebo (68, 80)                                                           | 52/16       | 2/318 | Random difference in all comparisons.                       | Low      |  | Allocation concealment: unclear (68), adequate (80); double-blinded, intention-to-treat analyses: yes; attrition bias: yes; funding: pharmaceutical/government         |
| Peginterferon- $\alpha$ 2a + lamivudine vs. lamivudine (49)                               | 48/24       | 1/814 | RD, 0.08 (0.01 to 0.15)*                                    | Low      |  | Allocation concealment: unclear; partially double-blinded, pathologist-blinded, intention-to-treat analyses: yes; attrition bias: yes; funding: pharmaceutical         |
| Pegylated interferon- $\alpha$ 2a + lamivudine vs. pegylated interferon- $\alpha$ 2a (49) | 48/24       | 1/814 | RD, -0.05 (-0.12 to 0.03)                                   | Low      |  | Allocation concealment: unclear; partially double-blinded, pathologist-blinded, intention-to-treat analyses: yes; attrition bias: yes; funding: pharmaceutical         |
| Pegylated interferon- $\alpha$ 2a + placebo vs. lamivudine (49)                           | 48/24       | 1/814 | RD, 0.13 (0.06 to 0.20)*                                    | Moderate |  | Allocation concealment: unclear; partially double-blinded, pathologist-blinded, intention-to-treat analyses: yes; attrition bias: yes; funding: pharmaceutical         |
| Pegylated interferon- $\alpha$ 2a vs. pegylated interferon- $\alpha$ 2a (125)             | 24/24       | 1/194 | Random difference in all dose comparisons. No dose response | Low      |  | Allocation concealment: unclear; open-label, intention-to-treat analyses: yes; attrition bias: yes; funding: pharmaceutical                                            |
| Pegylated interferon- $\alpha$ 2b+lamivudine vs. lamivudine (50)                          | 52-60/40-96 | 1/100 | Random difference in all time of follow-up comparisons.     | Low      |  | Allocation concealment: adequate; open-label, intention-to-treat analyses: yes (1 dose required); attrition bias: yes; funding: pharmaceutical                         |
| Pegylated interferon- $\alpha$ 2b + lamivudine vs. pegylated interferon- $\alpha$ 2b (90) | 52/26       | 1/307 | Random difference in all comparisons.                       | Low      |  | Allocation concealment: unclear; double-blinded, pathologist-blinded, intention-to-treat analyses: yes (1 dose required); attrition bias: yes; funding: pharmaceutical |

### HBsAg loss at the end of treatment

|                                                                               |             |        |                                       |          |                                                                                                                                                                                                                    |
|-------------------------------------------------------------------------------|-------------|--------|---------------------------------------|----------|--------------------------------------------------------------------------------------------------------------------------------------------------------------------------------------------------------------------|
| Adefovir + lamivudine vs. adefovir (72)                                       | 48/0        | 1/39   | RD, 0.05 (-0.08 to 0.18)              | Low      | Allocation concealment: unclear; double-blinded, intention-to-treat analyses: yes (1 dose required); attrition bias: yes; funding: not reported                                                                    |
| Adefovir + lamivudine vs. lamivudine (72)                                     | 48/0        | 1/39   | RD, 0.05 (-0.08 to 0.18)              | Low      | Allocation concealment: unclear; double-blinded, intention-to-treat analyses: yes (1 dose required); attrition bias: yes; funding: not reported                                                                    |
| Adefovir dipivoxil (240 vs. 114 wk) (42)                                      | 240 vs. 114 | 1/250  | RD, -0.048 (-0.088 to -0.008)*        | Low      | Allocation concealment: unclear; double-blinded, intention-to-treat analyses: yes; attrition bias: not reported funding: pharmaceutical                                                                            |
| Entecavir vs. lamivudine (44, 47)                                             | 52-96/0     | 2/1117 | Random difference in all comparisons. | Moderate | Allocation concealment: unclear; double-blinded, pathologist-blinded, intention-to-treat analyses: yes; attrition bias: yes; funding: pharmaceutical                                                               |
| Interferon- $\alpha$ 2b + corticosteroid vs. interferon- $\alpha$ 2b (37, 38) | 16-24/0     | 2/125  | Random difference in all comparisons. | Moderate | Allocation concealment: unclear; open-label, intention-to-treat analyses: yes; attrition bias: yes; funding: pharmaceutical (37), government, pharmaceutical (38)                                                  |
| Interferon- $\alpha$ 2b + corticosteroid vs. no treatment (38, 48)            | 24/0        | 2/103  | RD, 0.11 (0.02 to 0.20)*<br>0.917/0%  | Moderate | Allocation concealment: unclear; partially double-blinded (38), open-label (48), intention-to-treat analyses: yes (38), no (48); attrition bias: yes; funding: government, pharmaceutical                          |
| Interferon- $\alpha$ 2b + lamivudine vs. lamivudine (80, 82)                  | 52-96/0     | 2/262  | Random difference in all comparisons  | Moderate | Allocation concealment: adequate; open-label (82), double-blinded (80), intention-to-treat analyses: unclear (82), yes (80); attrition bias: yes; funding: not reported (82), pharmaceutical/government/other (80) |
| Interferon- $\alpha$ 2b + lamivudine vs. placebo                              | 52/0        | 1/119  | RD, 0.06 (0.00 to 0.13)               | Low      | Allocation concealment: yes; double-blinded, intention-to-treat analyses:                                                                                                                                          |

(80)

|                                                                                           |             |       |                                                 |                                              |                                                                                                                                                                                                                                                                    |
|-------------------------------------------------------------------------------------------|-------------|-------|-------------------------------------------------|----------------------------------------------|--------------------------------------------------------------------------------------------------------------------------------------------------------------------------------------------------------------------------------------------------------------------|
| Interferon- $\alpha$ 2b vs. interferon- $\alpha$ 2b (38)                                  | 24/0        | 1/82  | RD, 0.10 (-0.01; 0.21)<br>(RD) No dose response | Low                                          | yes; attrition bias: yes; funding: pharmaceutical/government/ other<br>Allocation concealment: unclear; partially double-blinded, intention-to-treat analyses: yes; attrition bias: yes; funding: government, pharmaceutical                                       |
| Interferon- $\alpha$ 2b vs. no treatment (38, 40, 54)                                     | 16-96/0     | 3/166 | RD, 0.06 (-0.03 to 0.15)<br>0.209/36.2%         | Moderate                                     | Allocation concealment: unclear; open-label (40, 54), partially double-blinded (38), intention-to-treat analyses: no (40), yes (38, 54); attrition bias: yes; funding: not reported (40), private (54), government, pharmaceutical (38)                            |
| Lamivudine vs. placebo (80)                                                               | 52/0        | 1/175 | RD, 0.02 (-0.02 to 0.05)                        | Low. Sparse data (0 events in control group) | Allocation concealment: yes; double-blinded, intention-to-treat analyses: yes; attrition bias: yes; funding: pharmaceutical/government/ other                                                                                                                      |
| Pegylated interferon- $\alpha$ 2b + lamivudine vs. pegylated interferon- $\alpha$ 2b (90) | 52/0        | 1/307 | RD, 0.01 (-0.04 to 0.06)                        | Low                                          | Allocation concealment: unclear; double-blinded, pathologist-blinded, intention-to-treat analyses: yes (1 dose); attrition bias: yes; funding: pharmaceutical                                                                                                      |
| <b>HBsAg loss at follow-up</b>                                                            |             |       |                                                 |                                              |                                                                                                                                                                                                                                                                    |
| Interferon- $\alpha$ 2b vs. no treatment (33, 35, 40, 54)                                 | 16-96/8-48  | 4/247 | Random difference in all comparisons.           | Low. Sparse data (0 events in control group) | Allocation concealment: unclear (35, 40, 54), adequate (33); double-blinded (35), open-label (40, 54), intention-to-treat analyses: yes (33, 35, 54), no (40); attrition bias: yes; funding: pharmaceutical (35), private (54), not reported (33, 40)              |
| Interferon- $\alpha$ 2b + lamivudine vs. lamivudine (31, 80, 89)                          | 24-52/16-48 | 3/495 | Random difference in all comparisons.           | Low. Sparse data (0 events in both groups)   | Allocation concealment: unclear (89), adequate (31, 80); open-label (31, 89), double blinded (80), intention-to-treat analyses: yes; attrition bias: yes (none); funding: foundations (89)<br>pharmaceutical/government/ other (80), none from pharmaceutical (31) |

|                                                                                     |              |        |                                                        |                                              |                                                                                                                                                                                             |
|-------------------------------------------------------------------------------------|--------------|--------|--------------------------------------------------------|----------------------------------------------|---------------------------------------------------------------------------------------------------------------------------------------------------------------------------------------------|
| Interferon- $\alpha$ 2b + lamivudine vs. placebo (80)                               | 52/16        | 1/119  | RD, 0.05 (-0.01 to 0.11)                               | Low. Sparse data (0 events in control group) | Allocation concealment: yes; double-blinded, intention-to-treat analyses: yes; attrition bias: yes; funding: pharmaceutical/government/ other                                               |
| Interferon- $\alpha$ 2b vs. interferon- $\alpha$ 2b (32, 36)                        | 24-48/48     | 2/103  | Random difference in all comparisons. No dose response | Low. Sparse data (0 events in both groups)   | Allocation concealment: unclear; open-label, intention-to-treat analyses: not reported (32), yes (36); attrition bias: yes; funding: not reported (32), foundation (36)                     |
| Interferon- $\alpha$ 2b + corticosteroid vs. interferon- $\alpha$ 2b (51, 123, 124) | 24/24-26     | 3/141  | Random difference in all comparisons.                  | Low. Sparse data (small number of events)    | Allocation concealment: unclear; open-label, intention-to-treat analyses: yes; attrition bias: yes; funding: pharmaceutical (51), not reported (123, 124)                                   |
| Lamivudine vs. placebo (60, 68, 80)                                                 | 52-96/16-26  | 3/1068 | Random difference in all comparisons.                  | Random difference in all comparisons.        | Allocation concealment: adequate (80), unclear (60, 68); double-blinded, intention-to-treat analyses: yes; attrition bias: yes (68, 80), no (60); funding: pharmaceutical/government/ other |
| <b>HBsAg seroconversion—end of treatment</b>                                        |              |        |                                                        |                                              |                                                                                                                                                                                             |
| Adefovir vs. placebo (64)                                                           | 96 wk/0      | 1/120  | RD, 0.01 (-0.03 to 0.06)                               | Low                                          | Allocation concealment: unclear; double-blinded, intention-to-treat analyses: yes; attrition bias: not reported funding: pharmaceutical                                                     |
| Adefovir (longer treatment) (42, 64)                                                | 48-240 wk/ 0 | 2/390  | Random differences in all comparisons.                 | Low                                          | Allocation concealment: unclear; double-blinded, intention-to-treat analyses: yes; attrition bias: not reported funding: pharmaceutical                                                     |
| Entecavir vs. lamivudine (47)                                                       | 96/0         | 1/408  | RD, -0.02 (-0.06 to 0.01)                              | Low                                          | Allocation concealment: unclear; double-blinded, pathologist-blinded, intention-to-treat analyses: yes; attrition bias: yes; funding: pharmaceutical                                        |

#### HBsAg seroconversion at follow-up

|                                                                    |          |        |                                                                         |                                                                                                 |                                                                                                                                                                                                                                                                 |
|--------------------------------------------------------------------|----------|--------|-------------------------------------------------------------------------|-------------------------------------------------------------------------------------------------|-----------------------------------------------------------------------------------------------------------------------------------------------------------------------------------------------------------------------------------------------------------------|
| Pegylated interferon- $\alpha$ 2b vs. interferon- $\alpha$ 2b (93) | 24/24    | 1/230  | Random difference in all comparisons.                                   | Low                                                                                             | Allocation concealment: adequate; open-label, intention-to-treat analyses: yes; attrition bias: yes; funding: not reported                                                                                                                                      |
| Interferon- $\alpha$ 2b vs. placebo (54)                           | 96/48    | 1/42   | RD, 0.10 (-0.05 to 0.24)                                                | Low                                                                                             | Allocation concealment: unclear; open-label, intention-to-treat analyses: yes; attrition bias: yes; funding: private                                                                                                                                            |
| Interferon- $\alpha$ 2b vs. no treatment (40)                      | 16/48-64 | 1/40   | RD, 0.15 (-0.05 to 0.35)                                                | Low                                                                                             | Allocation concealment: unclear; open-label, intention-to-treat analyses: no attrition bias: yes; funding: not reported                                                                                                                                         |
| <b>HBV DNA loss—end of treatment</b>                               |          |        |                                                                         |                                                                                                 |                                                                                                                                                                                                                                                                 |
| Adefovir + lamivudine vs. lamivudine (71, 72)                      | 48-52/0  | 2/134  | RD, 0.25 (0.10 to 0.39)*<br>0.219/34%                                   | Low. Sparse data (0 events in control group)                                                    | Allocation concealment: unclear; double-blinded, intention-to-treat analyses: yes (1 dose required); attrition bias: yes; funding: not reported                                                                                                                 |
| Adefovir vs. adefovir (42, 64, 65, 74, 76)                         | 48-240/0 | 5/1520 | RD, -0.08 (-0.16 to 0.01)<br>0.049/58% RR 0.84 (0.68 to 1.04) 0.034/62% | Moderate. One RCT reported greater HBV DNA loss after 30 vs. 10 mg (0.18; 95% CI 0.08 to 0.27)* | Allocation concealment: unclear (42, 64, 65), adequate (74, 76); double-blinded (42, 64, 65, 74), open-label (76), intention-to-treat analyses: yes (42, 64, 65, 74), no (75); attrition bias: not reported (42, 64); yes (65, 74, 76); funding: pharmaceutical |
| Adefovir + lamivudine vs. adefovir (72)                            | 48/0     | 1/39   | RD, 0.09 (-0.20 to 0.37)                                                | Low                                                                                             | Allocation concealment: unclear; double-blinded, intention-to-treat analyses: yes (1 dose required); attrition bias: yes; funding: not reported                                                                                                                 |
| Adefovir vs. placebo (63-65, 74)                                   | 48-96/0  | 4/1002 | RD, 0.38 (0.23 to 0.53)*<br>0/93% RR 20.41 (6.79 to 61.32)* 0.267/24%   | High                                                                                            | Allocation concealment: unclear (63-65), adequate (74); double-blinded, intention-to-treat analyses: yes; attrition bias: yes; funding: pharmaceutical                                                                                                          |
| Entecavir (Dose) (70)                                              | 24/0     | 1/177  | Random difference in all comparisons.                                   | Low                                                                                             | Allocation concealment: adequate; double-blinded, intention-to-treat analyses: no attrition bias: yes; funding: several authors noted as receiving support from pharmaceutical                                                                                  |

|                                                                                    |         |        |                                                                                                     |                                                                                                                                                                     |                                                                                                                                                                                                                                 |
|------------------------------------------------------------------------------------|---------|--------|-----------------------------------------------------------------------------------------------------|---------------------------------------------------------------------------------------------------------------------------------------------------------------------|---------------------------------------------------------------------------------------------------------------------------------------------------------------------------------------------------------------------------------|
| Entecavir vs. lamivudine (44, 45, 47, 70)                                          | 24-96/0 | 4/1636 | RD, 0.23 (0.11 to 0.35)*<br>0/89% No dose response                                                  | Low                                                                                                                                                                 | Allocation concealment: adequate (45, 70), unclear (44, 47); double-blinded, intention-to-treat analyses: no (45, 70), yes; (44, 47) attrition bias: yes; funding: pharmaceutical                                               |
| Entecavir vs. lamivudine (44, 45, 47, 70)                                          | 24-96/0 | 4/1636 | RR, 1.64 (1.22 to 2.22)<br>0/92% No dose response                                                   | Low                                                                                                                                                                 | Allocation concealment: adequate (45, 70), unclear (44, 47); double-blinded, intention-to-treat analyses: no (45, 70), yes; (44, 47) attrition bias: yes; funding: pharmaceutical                                               |
| Entecavir vs. lamivudine (44, 45, 47, 70)                                          | 24-96/0 | 4/1636 | RD, >1 y of active treatment 0.30 (0.16 to 0.44)* RD, 6 mo of active treatment 0.09 (-0.04 to 0.21) | Moderate. Length of active treatment was associated with greater differences in absolute rates of HBV DNA loss with significant differences after >1 y of treatment | Allocation concealment: adequate (45, 70), unclear (44, 47); double-blinded, intention-to-treat analyses: no (45, 70), yes; (44, 47) attrition bias: yes; funding: pharmaceutical                                               |
| Interferon- $\alpha$ 2b + corticosteroid vs. interferon- $\alpha$ 2b (37, 39)      | 16-24/0 | 2/77   | Random difference in all comparisons.                                                               | Low                                                                                                                                                                 | Allocation concealment: unclear (37), adequate (39); open-label (37), unclear although study placebo-controlled (39) intention-to-treat analyses: yes (37), no (39); attrition bias: yes (37), no (39); funding: pharmaceutical |
| Interferon- $\alpha$ 2b + corticosteroid vs. no treatment (37)                     | 16/0    | 1/34   | RD, 0.25 (0.04 to 0.46)*                                                                            | Low                                                                                                                                                                 | Allocation concealment: unclear; open-label, intention-to-treat analyses: yes; attrition bias: yes; funding: pharmaceutical                                                                                                     |
| Interferon- $\alpha$ 2b + lamivudine vs. interferon- $\alpha$ 2b (79)              | 24/0    | 1/144  | RD, 0.00 (-0.12 to 0.12)                                                                            | Low                                                                                                                                                                 | Allocation concealment: adequate; blinded $\leq$ wk 8 pathologist-blinded, intention-to-treat analyses: yes; attrition bias: yes; funding: pharmaceutical                                                                       |
| Interferon- $\alpha$ 2b + lamivudine vs. interferon- $\alpha$ 2b + lamivudine (99) | 16/0    | 1/20   | RD, 0.00 (-0.21 to 0.21)                                                                            | Low. No differences between interferon- $\alpha$ 2b + lamivudine for 20 wk vs. interferon-                                                                          | Allocation concealment: adequate; double-blinded, intention-to-treat analyses: yes; attrition bias: yes; funding: not reported                                                                                                  |

|                                                                                        |         |       |                                                                                                                                                                         | $\alpha$ 2b +4 wk placebo<br>then 12 wk<br>lamivudine on HBV<br>DNA loss                                                                           |                                                                                                                                                                                                                                                                                                                                                                                                                                                                                                                                                             |
|----------------------------------------------------------------------------------------|---------|-------|-------------------------------------------------------------------------------------------------------------------------------------------------------------------------|----------------------------------------------------------------------------------------------------------------------------------------------------|-------------------------------------------------------------------------------------------------------------------------------------------------------------------------------------------------------------------------------------------------------------------------------------------------------------------------------------------------------------------------------------------------------------------------------------------------------------------------------------------------------------------------------------------------------------|
| Interferon- $\alpha$ 2b +<br>lamivudine vs. lamivudine<br>(31, 59, 73, 79, 80, 82, 84) | 24-96/0 | 7/786 | RD, 0.03 (-0.11 to 0.17)<br>0/81%                                                                                                                                       | High                                                                                                                                               | Allocation concealment: adequate (31, 59, 79, 82), adequate (lottery cards) (73), unclear (84): yes (80); open-label (31, 59, 73, 82, 84), pathologist-blinded, (31, 59, 79, 80, 84), blinded $\leq$ wk 8 (79), double-blinded (80), until wk 8 (IFN assigned) (80), intention-to-treat analyses: yes (31, 59, 73, 79, 80, 84), unclear (82); attrition bias: yes (31, 59, 73, 79, 80, 84), no withdrawals reported (82); funding: none from pharmaceutical (31), pharmaceutical (79), pharmaceutical/ government/other (80), not reported (59, 73, 82, 84) |
| Interferon- $\alpha$ 2b +<br>lamivudine vs. placebo<br>(80)                            | 52/0    | 1/119 | RD, in HBV DNA<br>response <3 pg/mL 0.48<br>(0.33 to 0.63)* RD in<br>sustained HBV DNA<br>response: no two<br>consecutive detectable<br>HBV DNA 0.05 (-0.09 to<br>0.18) | Low                                                                                                                                                | Allocation concealment: yes; double-blinded, intention-to-treat analyses: yes; attrition bias: yes; funding: pharmaceutical/ government/ other                                                                                                                                                                                                                                                                                                                                                                                                              |
| Interferon- $\alpha$ 2b + placebo<br>vs. lamivudine (79)                               | 24/0    | 1/76  | RD, -0.03 (-0.15 to 0.09)                                                                                                                                               |                                                                                                                                                    | Allocation concealment: adequate; blinded $\leq$ wk 8 intention-to-treat analyses: yes; attrition bias: yes; funding: pharmaceutical                                                                                                                                                                                                                                                                                                                                                                                                                        |
| Interferon- $\alpha$ 2b vs.<br>interferon- $\alpha$ 2b (32, 36, 39)                    | 0/0     | 3/141 | Random difference in all<br>dose comparisons. No<br>dose response                                                                                                       | Moderate. Different<br>length of treatment<br>and doses of<br>Interferon- $\alpha$ 2b were<br>associated with<br>random changes in<br>HBV DNA loss | Allocation concealment: unclear (32, 36), adequate (39); open-label, intention-to-treat analyses: not reported (32, 39), yes (36); attrition bias: no (32, 39), yes (36); funding: not reported (32, 39), foundation (36)                                                                                                                                                                                                                                                                                                                                   |

|                                                                    |          |        |                                                                     |                                                                                                                                              |                                                                                                                                                                                                                                                                                                                                                                                                                                                                                   |
|--------------------------------------------------------------------|----------|--------|---------------------------------------------------------------------|----------------------------------------------------------------------------------------------------------------------------------------------|-----------------------------------------------------------------------------------------------------------------------------------------------------------------------------------------------------------------------------------------------------------------------------------------------------------------------------------------------------------------------------------------------------------------------------------------------------------------------------------|
| Interferon- $\alpha$ 2b vs. no treatment (37)                      | 16/0     | 1/34   | RD, 0.45 (0.22 to 0.68)*                                            | Low                                                                                                                                          | Allocation concealment: unclear; open-label, intention-to-treat analyses: yes; attrition bias: yes; funding: pharmaceutical                                                                                                                                                                                                                                                                                                                                                       |
| Lamivudine vs. adefovir (72)                                       | 48/0     | 1/38   | RD, -0.26 (-0.47 to -0.06)*                                         | Low                                                                                                                                          | Allocation concealment: unclear; double-blinded, intention-to-treat analyses: yes (1 dose required); attrition bias: yes; funding: not reported                                                                                                                                                                                                                                                                                                                                   |
| Lamivudine (67, 126, 127)                                          | 24-104/0 | 3/581  | RD, 0.21 (0.10 to 0.31)*<br>0.187/35% dose response association     | Moderate. Larger doses of lamivudine resulted in greater HBV DNA loss, the length of treatment was not associated with greater dose response | Allocation concealment: unclear; double-blinded, intention-to-treat analyses: yes; attrition bias: no (67, 126), yes (127); funding: pharmaceutical                                                                                                                                                                                                                                                                                                                               |
| Lamivudine 60 vs. 48 wk (88)                                       | 60/0     | 1/429  | RD, -0.08 (-0.08 to 0.2)                                            | Low. Longer treatment did not increase HBV DNA loss                                                                                          | Allocation concealment: unclear; double-blind intention-to-treat analyses: no; attrition bias: no; funding: not reported                                                                                                                                                                                                                                                                                                                                                          |
| Lamivudine vs. placebo or usual care (60, 67, 68, 75, 80, 88, 126) | 12-104/0 | 7/1305 | RD, 0.48 (0.31 to 0.66)*<br>0/94% RR 3.79 (2.71 to 5.30)* 0.046/53% | High                                                                                                                                         | Allocation concealment: yes (80), unclear (60, 67, 68, 75, 88, 126); open-label (75), double-blinded (60, 67, 68, 80, 88, 126) until wk 8 (IFN assigned) (80), pathologist-blinded (60, 68, 80), intention-to-treat analyses: yes (60, 67, 68, 75, 80, 126), no (88); attrition bias: yes (68, 80), no (60, 67, 88, 126), none reported (75); funding: pharmaceutical/government/ other (80), pharmaceutical/ government (68) pharmaceutical (58, 65, 126), not reported (75, 88) |

|                                                                                          |         |       |                             |          |                                                                                                                                                                                  |
|------------------------------------------------------------------------------------------|---------|-------|-----------------------------|----------|----------------------------------------------------------------------------------------------------------------------------------------------------------------------------------|
| Pegylated interferon- $\alpha$ 2a+ lamivudine vs. lamivudine (49)                        | 48/0    | 1/543 | RD, 0.29 (0.21 to 0.37)*    | Moderate | Allocation concealment: unclear; partially double-blinded, pathologist-blinded, intention-to-treat analyses: yes (1 dose required); attrition bias: yes; funding: pharmaceutical |
| Pegylated interferon- $\alpha$ 2a+ lamivudine vs. pegylated interferon- $\alpha$ 2a (49) | 48/0    | 1/542 | RD, 0.44 (0.36 to 0.51)*    | Moderate | Allocation concealment: unclear; partially double-blinded, pathologist-blinded, intention-to-treat analyses: yes (1 dose required); attrition bias: yes; funding: pharmaceutical |
| Pegylated interferon- $\alpha$ 2a+ placebo vs. lamivudine (49)                           | 48/0    | 1/543 | RD, -0.15 (-0.22 to -0.07)* | Moderate | Allocation concealment: unclear; partially double-blinded, pathologist-blinded, intention-to-treat analyses: yes (1 dose required); attrition bias: yes; funding: pharmaceutical |
| Pegylated interferon- $\alpha$ 2b+ lamivudine vs. lamivudine (78)                        | 60/0    | 1/100 | RD, 0.06 (-0.04 to 0.16)    | Low      | Allocation concealment: adequate; open-label, pathologist-blinded, intention-to-treat analyses: yes (1 dose required); attrition bias: yes                                       |
| Lamivudine vs. telbivudine (58)                                                          | 52/0    | 1/63  | RD, -0.30 (-0.55 to -0.04)* | Low      | Allocation concealment: unclear; double-blinded, intention-to-treat analyses: yes; attrition bias: yes; funding: pharmaceutical                                                  |
| Telbivudine + lamivudine vs. lamivudine (58)                                             | 52/0    | 1/60  | RD, 0.17 (-0.09 to 0.43)    | Low      | Allocation concealment: unclear; double-blinded, intention-to-treat analyses: yes; attrition bias: yes; funding: pharmaceutical                                                  |
| Telbivudine + lamivudine vs. telbivudine (58)                                            | 52/0    | 1/85  | RD, -0.13 (-0.34 to 0.08)   | Low      | Allocation concealment: unclear; double-blinded, intention-to-treat analyses: yes; attrition bias: yes; funding: pharmaceutical                                                  |
| Telbivudine vs. adefovir (76)                                                            | 24-52/0 | 1/136 | RD, 0.28 (0.12 to 0.44)*    | Low      | Allocation concealment: adequate; open-label, intention-to-treat analyses: no; attrition bias: yes; funding: pharmaceutical                                                      |

### HBV DNA loss at time of follow-up

|                                                                                            |              |       |                                         |          |                                                                                                                                                                                                                                                                                                                                                                              |
|--------------------------------------------------------------------------------------------|--------------|-------|-----------------------------------------|----------|------------------------------------------------------------------------------------------------------------------------------------------------------------------------------------------------------------------------------------------------------------------------------------------------------------------------------------------------------------------------------|
| Adefovir vs. placebo (64)                                                                  | 96/18        | 1/120 | RD, 0.59 (0.46 to 0.72)*                | Low      | Allocation concealment: unclear; double-blinded, intention-to-treat analyses: yes; attrition bias: not reported; funding: pharmaceutical                                                                                                                                                                                                                                     |
| Entecavir vs. lamivudine (44)                                                              | 52/24        | 1/709 | RD, 0.01 (-0.02 to 0.05)                | Low      | Allocation concealment: unclear; double-blinded, pathologist-blinded, intention-to-treat analyses: yes; attrition bias: yes; funding: pharmaceutical                                                                                                                                                                                                                         |
| Interferon- $\alpha$ 2b + corticosteroid vs. interferon- $\alpha$ 2b (37-39, 51, 123, 124) | 16-24/24-72  | 6/322 | Random differences in all comparisons.  | High     | Allocation concealment: unclear (37, 38, 51, 123, 124), adequate (39); open-label (37, 123, 124), partially double-blinded (38, 51), blinding unclear (39); intention-to-treat analyses: yes (37, 38, 51, 123, 124), no (39); attrition bias: yes (37, 38, 51, 123, 124), no (39); funding: pharmaceutical (37, 51), not reported (39, 124); government, pharmaceutical (38) |
| Interferon- $\alpha$ 2b + corticosteroid vs. no treatment (37, 38)                         | 16-96/24     | 2/121 | Random differences in all Comparisons.  | Moderate | Allocation concealment: unclear; open-label, (37), partially double-blinded (38), intention-to-treat analyses: yes; attrition bias: yes; funding: pharmaceutical (37), government, pharmaceutical (38)                                                                                                                                                                       |
| Interferon- $\alpha$ 2b + lamivudine vs. interferon- $\alpha$ 2b (79, 81)                  | 24-48/4-56   | 2/278 | RD, 0.15 (-0.06 to 0.35)<br>0.002/80.4% | Low      | Allocation concealment: unclear (81), adequate (79); open-label (79), blinded $\leq$ wk 8 (79); intention-to-treat analyses: no (81), yes (79); attrition bias: yes; funding: not reported (81), pharmaceutical (79)                                                                                                                                                         |
| Interferon- $\alpha$ 2b + lamivudine vs. lamivudine (59, 73, 79, 83)                       | 24-176/12-40 | 4/365 | RD, 0.04 (-0.07 to 0.14)<br>0.071/57%   | Moderate | Allocation concealment: adequate (59, 73, 79), unclear (83); open-label (59, 73, 83), partially blinded, (79); intention-to-treat analyses: yes; attrition bias: yes; funding: not reported (59, 73, 83), pharmaceutical (79)                                                                                                                                                |

|                                                                      |             |       |                                                                                |                                                 |                                                                                                                                                                                                                                                                                                                                  |
|----------------------------------------------------------------------|-------------|-------|--------------------------------------------------------------------------------|-------------------------------------------------|----------------------------------------------------------------------------------------------------------------------------------------------------------------------------------------------------------------------------------------------------------------------------------------------------------------------------------|
| Interferon- $\alpha$ 2b + placebo vs. lamivudine (79)                | 24-52/12-40 | 1/151 | Random differences in all follow-up comparisons                                | Low                                             | Allocation concealment: adequate; blinded $\leq$ wk 8 pathologist-blinded, intention-to-treat analyses: yes; attrition bias: yes; funding: pharmaceutical                                                                                                                                                                        |
| Interferon- $\alpha$ 2b vs. interferon- $\alpha$ 2b (32, 36, 38, 39) | 24-48/4-72  | 4/297 | Random differences in all dose, length of treatment, and follow-up comparisons | Moderate                                        | Allocation concealment: unclear (32, 36, 38), adequate (39); open-label (32, 36), partially double-blinded (36), unclear (39) intention-to-treat analyses: not reported (32), yes (36, 38), no (39); attrition bias: yes (32, 36, 38), no (39); funding: not reported (32, 39), foundation (36), government, pharmaceutical (38) |
| Interferon- $\alpha$ 2b vs. no treatment (33, 37, 38)                | 16/8-24     | 3/168 | RD, 0.44 (0.27 to 0.60)*<br>0.573/0%                                           | Low                                             | Allocation concealment: adequate (33), unclear (37, 38); open-label (37), partially double-blinded (38), intention-to-treat analyses: yes; attrition bias: yes; funding: not reported (33), government, pharmaceutical (38), pharmaceutical (37)                                                                                 |
| Interferon- $\alpha$ 2b vs. no treatment (33, 37, 38)                |             |       | RD, 0.28 (-0.04 to 0.60)<br>0/89%                                              | The effects were attenuated at longer follow-up | Allocation concealment: adequate (33), unclear (37, 38); open-label (37), partially double-blinded (38), intention-to-treat analyses: yes; attrition bias: yes; funding: not reported (33), government, pharmaceutical (38), pharmaceutical (37)                                                                                 |
| Lamivudine vs. placebo (60)                                          | 96/24       | 1/136 | RD, 0.08 (0.01 to 0.15)*                                                       |                                                 | Allocation concealment: unclear; double-blinded, pathologist-blinded, intention-to-treat analyses: yes; attrition bias: no funding: pharmaceutical                                                                                                                                                                               |
| Pegylated interferon- $\alpha$ 2a + lamivudine vs. lamivudine (49)   | 48/24       | 1/543 | RD, 0.09 (0.04 to 0.13)*                                                       | Low                                             | Allocation concealment: unclear; partially double-blinded, pathologist-blinded, intention-to-treat analyses: yes (1 dose required); attrition bias: yes;                                                                                                                                                                         |

|                                                                                           |             |       |                           |     |                                                                                                                                                                                                             |
|-------------------------------------------------------------------------------------------|-------------|-------|---------------------------|-----|-------------------------------------------------------------------------------------------------------------------------------------------------------------------------------------------------------------|
| Pegylated interferon- $\alpha$ 2a + lamivudine vs. pegylated interferon- $\alpha$ 2a (49) | 48/24       | 1/542 | RD, -0.01 (-0.07 to 0.05) | Low | funding: pharmaceutical<br>Allocation concealment: unclear; partially double-blinded, pathologist-blinded, intention-to-treat analyses: yes (1 dose required); attrition bias: yes; funding: pharmaceutical |
| Pegylated interferon- $\alpha$ 2a + placebo vs. lamivudine (49)                           | 48/24       | 1/543 | RD, 0.09 (0.04 to 0.14)*  | Low | Allocation concealment: unclear; partially double-blinded, pathologist-blinded, intention-to-treat analyses: yes (1 dose required); attrition bias: yes; funding: pharmaceutical                            |
| Pegylated interferon- $\alpha$ 2b + lamivudine vs. lamivudine (50)                        | 52-60/24-57 | 1/100 | RD, 0.00 (-0.04 to 0.04)  | Low | Allocation concealment: adequate; open-label, intention-to-treat analyses: yes (1 dose required); attrition bias: yes; funding: pharmaceutical                                                              |

### C. Histologic outcomes

#### Histologic improvement at end of treatment

|                                        |          |       |                                                               |                                                              |                                                                                                                                                                                                    |
|----------------------------------------|----------|-------|---------------------------------------------------------------|--------------------------------------------------------------|----------------------------------------------------------------------------------------------------------------------------------------------------------------------------------------------------|
| Adefovir vs. placebo (63-, 65)         | 48-96/0  | 3/819 | RD, 0.26 (0.17 to 0.34)*<br>0.086/55%                         | High                                                         | Allocation concealment: unclear; double-blinded, intention-to-treat analyses: yes; attrition bias: not reported (63); yes (65); funding: pharmaceutical                                            |
| Adefovir vs. placebo (63, 65)          | 48-96/0  | 2/699 | RD, 0.20 (0.14 to 0.26)*<br>0.395/0% No dose response         | Moderate                                                     | Allocation concealment: unclear; double-blinded, intention-to-treat analyses: yes; attrition bias: not reported (63); yes (65); funding: pharmaceutical                                            |
| Lamivudine vs. placebo (60, 66-68)     | 48-96/0  | 4/580 | RD, 0.25 (0.13 to 0.38)*<br>0.025/68% RR 2.09 (1.60 to 2.74)* | Moderate                                                     | Allocation concealment: unclear; double-blinded, intention-to-treat analyses: yes; attrition bias: yes (68), no (60, 66, 67); funding: pharmaceutical (60, 66, 67), pharmaceutical/government (66) |
| Adefovir vs. adefovir, 30 (42, 64, 65) | 48-240/0 | 3/905 | Random difference in all comparisons. No dose response        | Moderate. Dose and duration of treatments with adefovir were | Allocation concealment: unclear; double-blinded: yes; intention-to-treat analyses: yes; attrition bias: yes (65),                                                                                  |

|                                                                       |          |        |                                                        |                                                    |                                                                                                                                                                                                                                  |
|-----------------------------------------------------------------------|----------|--------|--------------------------------------------------------|----------------------------------------------------|----------------------------------------------------------------------------------------------------------------------------------------------------------------------------------------------------------------------------------|
| Entecavir vs. lamivudine (44-46)                                      | 52-63/0  | 3/1633 | RD, 0.14 (0.04 to 0.24)*<br>0.003/83% No dose response | not associated with improved histology<br>Moderate | not reported (42, 64); funding: pharmaceutical<br>Allocation concealment: unclear (44, 45), adequate (46); double-blinded, intention-to-treat analyses: yes; attrition bias: yes; funding: pharmaceutical (44, 45), unclear (46) |
| Entecavir vs. lamivudine (44, 46)                                     | 52-63/0  | 2/995  | RD, 0.10 (-0.02 to 0.22)<br>0.008/86% No dose response | Moderate                                           | Allocation concealment: unclear (44), adequate (46); double-blinded, intention-to-treat analyses: yes; attrition bias: yes; funding: pharmaceutical (44), unclear (46)                                                           |
| Interferon- $\alpha$ 2b + lamivudine vs. lamivudine (59, 80, 84)      | 24-52/0  | 3/327  | RD, -0.04 (-0.17 to 0.09)<br>0.185/36%                 | Moderate                                           | Allocation concealment: adequate (59, 80), unclear (84); open-label (59, 84), double blinded (80), intention-to-treat analyses: yes; attrition bias: yes; funding: not reported (59, 84), pharmaceutical/government/ other (80)  |
| Interferon- $\alpha$ 2b + lamivudine vs. lamivudine (31, 80)          | 52/0     | 2/389  | RD, 0.00 (-0.38 to 0.38)<br>0/93%                      | Low                                                | Allocation concealment: adequate; double-blinded (80), open-label (31), intention-to-treat analyses: yes; attrition bias: yes; funding: pharmaceutical/government/ other (80), none from pharmaceutical (31)                     |
| Lamivudine for 144 vs. 96 wk (128)                                    | 96-144/0 | 1/250  | RD, -0.16 (-0.24 to -0.08)*                            | Low                                                | Allocation concealment: unclear; open-label, intention-to-treat analyses: yes; attrition bias: yes; funding: pharmaceutical                                                                                                      |
| Interferon- $\alpha$ 2b + lamivudine vs. interferon- $\alpha$ 2b (81) | 48/0     | 1/48   | RD, 0.54 (0.28 to 0.79)*                               | Low                                                | Allocation concealment: unclear; open-label, intention-to-treat analyses: no; attrition bias: yes; funding: not reported                                                                                                         |
| Interferon- $\alpha$ 2b + lamivudine vs. placebo (80)                 | 52/0     | 1/119  | Random difference in total and inflammatory scores     | Low                                                | Allocation concealment: yes; double-blinded until wk 8 (IFN assigned), pathologist-blinded, intention-to-treat analyses: yes; attrition bias: yes; funding: pharmaceutical/government/ other                                     |

|                                                                                         |         |        |                                                       |      |                                                                                                                                                                        |
|-----------------------------------------------------------------------------------------|---------|--------|-------------------------------------------------------|------|------------------------------------------------------------------------------------------------------------------------------------------------------------------------|
| Interferon- $\alpha$ 2b vs. no treatment (54)                                           | 96/0    | 1/72   | RD, 0.24 (0.00 to 0.48)                               | Low  | Allocation concealment: unclear; open-label, intention-to-treat analyses: yes; attrition bias: yes; funding: private                                                   |
| Pegylated interferon $\alpha$ 2b + lamivudine vs. lamivudine (78)                       | 52-60/0 | 1/100  | Random difference in inflammatory and fibrosis scores | Low  | Allocation concealment: adequate; open-label, pathologist-blinded, intention-to-treat analyses: yes (1 dose required); attrition bias: yes                             |
| Pegylated interferon $\alpha$ 2b + lamivudine vs. pegylated interferon $\alpha$ 2b (90) | 52/0    | 1/307  | RD, -0.04 (-0.12 to 0.05)                             | Low  | Allocation concealment: unclear; double-blinded, pathologist-blinded, intention-to-treat analyses: yes (1 dose required); attrition bias: yes; funding: pharmaceutical |
| <b>Histologic improvement at follow-up</b>                                              |         |        |                                                       |      |                                                                                                                                                                        |
| Interferon- $\alpha$ 2b + lamivudine vs. interferon- $\alpha$ 2b (79)                   | 24/28   | 1/144  | RD, -0.08 (-0.23 to 0.07)                             | Low  | Allocation concealment: adequate; blinded $\leq$ wk 8 pathologist-blinded, intention-to-treat analyses: yes; attrition bias: yes; funding: pharmaceutical              |
| Interferon- $\alpha$ 2b + lamivudine vs. lamivudine (79)                                | 24/28   | 1/157  | RD, -0.10 (-0.24 to 0.05)                             | Low  | Allocation concealment: adequate; blinded $\leq$ wk 8 pathologist-blinded, intention-to-treat analyses: yes; attrition bias: yes; funding: pharmaceutical              |
| Interferon- $\alpha$ 2b + placebo vs. lamivudine (79)                                   | 24/28   | 1/151  | RD, -0.02 (-0.17 to 0.14)                             | Low  | Allocation concealment: adequate; blinded $\leq$ wk 8 pathologist-blinded, intention-to-treat analyses: yes; attrition bias: yes; funding: pharmaceutical              |
| Interferon- $\alpha$ 2b vs. no treatment (40)                                           | 16/48   | 1/40   | RD, 0.15 (-0.05 to 0.35)                              | Low  | Allocation concealment: unclear; open-label, intention-to-treat analyses: no; attrition bias: yes; funding: not reported                                               |
| Pegylated interferon- $\alpha$ 2a + lamivudine vs. lamivudine (49, 69)                  | 48/24   | 2/1366 | Random difference in all comparisons                  | High | Allocation concealment: unclear; partially double-blinded, intention-to-treat analyses: yes; attrition bias: yes; funding: pharmaceutical                              |
| Pegylated interferon- $\alpha$ 2a +                                                     | 48/24   | 1/96   | RD, 0.04 (-0.05 to 0.12)                              | Low  | Allocation concealment: unclear;                                                                                                                                       |

lamivudine vs. pegylated interferon- $\alpha$ 2a (49)

partially double-blinded, pathologist-blinded, intention-to-treat analyses: yes (1 dose required); attrition bias: yes; funding: pharmaceutical

|                                                                                           |       |        |                                      |          |                                                                                                                                                                        |
|-------------------------------------------------------------------------------------------|-------|--------|--------------------------------------|----------|------------------------------------------------------------------------------------------------------------------------------------------------------------------------|
| Pegylated interferon- $\alpha$ 2b + lamivudine vs. pegylated interferon- $\alpha$ 2b (90) | 52/26 | 1/307  | RD, 0.03 (-0.04 to 0.09)             | Low      | Allocation concealment: unclear; double-blinded, pathologist-blinded, intention-to-treat analyses: yes (1 dose required); attrition bias: yes; funding: pharmaceutical |
| Pegylated interferon- $\alpha$ 2 + placebo vs. lamivudine (69)                            | 48/24 | 1/552  | RD, -0.01 (-0.07 to 0.06)            | Low      | Allocation concealment: unclear; partially double-blinded, intention-to-treat analyses: yes; attrition bias: yes; funding: pharmaceutical                              |
| Pegylated interferon- $\alpha$ 2a + placebo vs. lamivudine (49, 69)                       | 48/24 | 2/1366 | Random difference in all comparisons | Moderate | Allocation concealment: unclear; partially double-blinded, intention-to-treat analyses: yes; attrition bias: yes; funding: pharmaceutical                              |
| Pegylated interferon- $\alpha$ 2a + placebo vs. lamivudine (69)                           | 48/24 | 1/552  | RD, 0.12 (0.02 to 0.22)*             | Low      | Allocation concealment: unclear; partially double-blinded, intention-to-treat analyses: yes; attrition bias: yes; funding: pharmaceutical                              |

#### D. Biochemical outcomes

##### ALT normalization end of treatment

|                                                  |          |       |                                                                                    |                                                                                    |                                                                                                                                                      |
|--------------------------------------------------|----------|-------|------------------------------------------------------------------------------------|------------------------------------------------------------------------------------|------------------------------------------------------------------------------------------------------------------------------------------------------|
| Adefovir + lamivudine vs. adefovir (72)          | 48/0     | 1/39  | RD, 0.03 (-0.29 to 0.34)                                                           | Low                                                                                | Allocation concealment: unclear; double-blinded, intention-to-treat analyses: yes (1 dose required); attrition bias: yes; funding: not reported      |
| Adefovir + lamivudine vs. lamivudine (71, 72)    | 48-52/0  | 2/134 | RD, 0.32 (0.13 to 0.52)*<br>0.158/50%                                              | Moderate                                                                           | Allocation concealment: unclear; double-blinded, intention-to-treat analyses: yes (1 dose required); attrition bias: yes; funding: not reported (72) |
| Adefovir (dose or duration) (42, 64, 65, 74, 76) | 48-240/0 | 5/173 | RD, -0.06 (-0.12 to -0.01)* for shorter treatment vs. longest)<br>0.709/0% No dose | Longer treatment with adefovir associated with increased rate of ALT normalization | Allocation concealment: unclear (42, 64, 65), adequate (74, 76); double-blinded (42, 64, 65, 74), open-label (76), intention-to-treat analyses: yes  |

|                                                                                    |         |        | response                                                                                 |                                                                                                                                             |                                                                                                                                                                                                                                          |
|------------------------------------------------------------------------------------|---------|--------|------------------------------------------------------------------------------------------|---------------------------------------------------------------------------------------------------------------------------------------------|------------------------------------------------------------------------------------------------------------------------------------------------------------------------------------------------------------------------------------------|
| Adefovir vs. placebo (63, 64, 65, 74)                                              | 48-96/0 | 4/1342 | RD, 0.40 (0.30 to 0.49)*<br>0.007/72% No dose response 2.97 (2.38; 3.69)* (RR) 0.219/30% | High                                                                                                                                        | (42, 64, 65, 74), no (76); attrition bias: not reported (42, 64); yes (65, 74, 76) funding: pharmaceutical                                                                                                                               |
| Entecavir (dose) (43, 70)                                                          | 24-48/0 | 2/359  | Random differences in all dose comparisons. No dose response                             | Moderate                                                                                                                                    | Allocation concealment: unclear (63-65), adequate (74); double-blinded, intention-to-treat analyses: yes; attrition bias: yes (65, 74), not reported (63, 64); funding: pharmaceutical                                                   |
| Entecavir vs. lamivudine (43-47, 70)                                               | 24-96/0 | 6/2423 | RD, 0.22 (0.11 to 0.32)*<br>0/87% RR 1.62 (1.28; 2.06)* 0/87%                            | High. The effect of entecavir on RD of ALT normalization was lower in RCTs with higher rates of the outcome after lamivudine administration | Allocation concealment: adequate (43, 46), unclear (44, 45, 47, 70); double-blinded, intention-to-treat analyses: yes (43-47), no (70); attrition bias: yes; funding: unclear (43, 46), pharmaceutical (44, 45, 44, 70)                  |
| Interferon- $\alpha$ 2b + lamivudine vs. interferon- $\alpha$ 2b (79)              | 24/0    | 1/144  | RD, -0.01 (-0.14 to 0.11)                                                                | Low                                                                                                                                         | Allocation concealment: adequate; blinded $\leq$ wk 8 pathologist-blinded, intention-to-treat analyses: yes; attrition bias: yes; funding: pharmaceutical                                                                                |
| Interferon- $\alpha$ 2b + lamivudine vs. interferon- $\alpha$ 2b + lamivudine (99) | 16/0    | 1/20   | RD, -0.05 (-0.42 to 0.32)                                                                | Low                                                                                                                                         | Allocation concealment: adequate; double-blinded, intention-to-treat analyses: yes; attrition bias: yes; funding: not reported                                                                                                           |
| Interferon- $\alpha$ 2b + lamivudine vs. lamivudine (59, 73, 79, 80, 89)           | 24-96/0 | 5/626  | RD, -0.02 (-0.16 to 0.12)<br>0.004/74%                                                   | Moderate                                                                                                                                    | Allocation concealment: adequate; double-blinded (79, 80, 89), open-label (59, 73), intention-to-treat analyses: yes; attrition bias: yes; funding: not reported (59, 73, 89), pharmaceutical (79), pharmaceutical/government/other (80) |

|                                                                       |         |        |                                                                   |          |                                                                                                                                                                                                                                                                                                                                                                 |
|-----------------------------------------------------------------------|---------|--------|-------------------------------------------------------------------|----------|-----------------------------------------------------------------------------------------------------------------------------------------------------------------------------------------------------------------------------------------------------------------------------------------------------------------------------------------------------------------|
| Interferon- $\alpha$ 2b + lamivudine vs. placebo (80)                 | 52/0    | 1/119  | RD, 0.03 (-0.10 to 0.16)                                          | Low      | Allocation concealment: yes; double-blinded until wk 8 (IFN assigned), pathologist-blinded, intention-to-treat analyses: yes; attrition bias: yes; funding: pharmaceutical/ government/ other                                                                                                                                                                   |
| Interferon- $\alpha$ 2b + placebo vs. lamivudine (79)                 | 24/0    | 1/151  | RD, -0.04 (-0.15 to 0.07)                                         | Low      | Allocation concealment: adequate; blinded $\leq$ wk 8 pathologist-blinded, intention-to-treat analyses: yes; attrition bias: yes; funding: pharmaceutical                                                                                                                                                                                                       |
| Interferon- $\alpha$ 2b (32, 36)                                      | 24-48/0 | 2/103  | Random differences in all dose and time comparisons               | Low      | Allocation concealment: unclear; open-label, intention-to-treat analyses: not reported (32), yes (36); attrition bias: yes; funding: not reported (32), foundation (36)                                                                                                                                                                                         |
| Lamivudine vs. adefovir (72)                                          | 48/0    | 1/38   | RD, -0.42 (-0.67 to -0.18)*                                       | Low      | Allocation concealment: unclear; double-blinded, intention-to-treat analyses: yes (1 dose required); attrition bias: yes; funding: not reported                                                                                                                                                                                                                 |
| Lamivudine (67, 88, 130)                                              | 48-52/0 | 3/838  | Random differences in all dose and time comparisons               | Moderate | Allocation concealment: partially double-blinded, intention-to-treat analyses: yes; attrition bias: yes                                                                                                                                                                                                                                                         |
| Lamivudine vs. no treatment or placebo (53) (60, 67, 68, 80, 88, 122) | 12-96/0 | 7/1602 | RD, 0.22 (0.13 to 0.31)*<br>0/78% RR 2.42 (1.94 to 3.01)* 0.44/0% |          | Allocation concealment: adequate (53, 80), unclear (60, 67, 68, 88, 122); double-blinded, intention-to-treat analyses: yes (53, 60, 67, 68, 80, 88), no (122); attrition bias: no (53, 60, 67), yes (68, 80, 88, 122); funding: institution (53), not reported (88), pharmaceutical/government/other (60), pharmaceutical/ government (68), pharmaceutical (67) |
| Lamivudine vs. telbivudine (58)                                       | 52/0    | 1/85   | Random differences in two of three dose comparisons               | Low      | Allocation concealment: unclear; double-blinded, intention-to-treat analyses: yes; attrition bias: yes; funding: pharmaceutical                                                                                                                                                                                                                                 |

|                                                                                           |      |       |                                                                        |                                                                                                                       |                                                                                                                                                                                  |
|-------------------------------------------------------------------------------------------|------|-------|------------------------------------------------------------------------|-----------------------------------------------------------------------------------------------------------------------|----------------------------------------------------------------------------------------------------------------------------------------------------------------------------------|
| Pegylated interferon- $\alpha$ 2a + lamivudine vs. lamivudine (49, 69)                    | 48/0 | 2/905 | RD, -0.20 (-0.29 to -0.10)* 0.141/54%                                  | High                                                                                                                  | Allocation concealment: unclear; partially double-blinded, intention-to-treat analyses: yes; attrition bias: yes; funding: pharmaceutical                                        |
| Pegylated interferon- $\alpha$ 2a + lamivudine vs. pegylated interferon- $\alpha$ 2a (49) | 48/0 | 1/542 | RD, 0.08 (-0.01 to 0.16)                                               | Low                                                                                                                   | Allocation concealment: unclear; partially double-blinded, pathologist-blinded, intention-to-treat analyses: yes (1 dose required); attrition bias: yes; funding: pharmaceutical |
| Pegylated interferon- $\alpha$ 2a + placebo vs. lamivudine (49, 69)                       | 48/0 | 2/905 | RD, -0.29 (-0.42 to -0.17)* 0.045/75% RR 0.57 (0.46 to 0.70)* 0.13/56% | Moderate                                                                                                              | Allocation concealment: unclear; partially double-blinded, pathologist-blinded, intention-to-treat analyses: yes (1 dose required); attrition bias: yes; funding: pharmaceutical |
| Pegylated interferon- $\alpha$ 2b + lamivudine vs. lamivudine (78)                        | 60/0 | 1/100 | RD, 0.12 (-0.02 to 0.26)                                               | Low                                                                                                                   | Allocation concealment: adequate; open-label, pathologist-blinded, intention-to-treat analyses: yes (1 dose required); attrition bias: yes                                       |
| Pegylated interferon- $\alpha$ 2b + lamivudine vs. pegylated interferon- $\alpha$ 2b (90) | 52/0 | 1/307 | RD, 0.14 (0.03 to 0.24)*                                               | Low                                                                                                                   | Allocation concealment: unclear; double-blinded, pathologist-blinded, intention-to-treat analyses: yes (1 dose required); attrition bias: yes; funding: pharmaceutical           |
| Telbivudine + lamivudine vs. lamivudine (58)                                              | 52/0 | 1/101 | Random differences in all 3 dose comparisons                           | Low. Three tested doses of telbivudine + lamivudine vs. lamivudine alone did not increase rates of ALT normalization  | Allocation concealment: unclear; double-blinded, intention-to-treat analyses: yes; attrition bias: yes; funding: pharmaceutical                                                  |
| Telbivudine + lamivudine vs. telbivudine (58)                                             | 52/0 | 1/101 | Random differences in all 3 dose comparisons                           | Low. Three tested doses of telbivudine + lamivudine vs. telbivudine alone did not increase rates of ALT normalization | Allocation concealment: unclear; double-blinded, intention-to-treat analyses: yes; attrition bias: yes; funding: pharmaceutical                                                  |
| Telbivudine vs. telbivudine (58)                                                          | 52/0 | 1/44  | RD, 0.09 (-0.11 to 0.29)<br>No dose response                           | Low. Telbivudine 600 mg vs. telbivudine                                                                               | Allocation concealment: unclear; double-blinded, intention-to-treat                                                                                                              |

|                                                                                     |              |       |                                                                                                                          |                                                    |                                                                                                                                                                                                                     |
|-------------------------------------------------------------------------------------|--------------|-------|--------------------------------------------------------------------------------------------------------------------------|----------------------------------------------------|---------------------------------------------------------------------------------------------------------------------------------------------------------------------------------------------------------------------|
|                                                                                     |              |       | association                                                                                                              | 400 mg did not improve rates of ALT normalization  | analyses: yes; attrition bias: yes; funding: pharmaceutical                                                                                                                                                         |
| Telbivudine vs. adefovir (76)                                                       | 24-52/0      | 1/135 | Random differences in all dose and time comparisons                                                                      | Low                                                | Allocation concealment: adequate; open-label, intention-to-treat analyses: no; attrition bias: yes; funding: pharmaceutical                                                                                         |
| <b>ALT normalization at follow-up</b>                                               |              |       |                                                                                                                          |                                                    |                                                                                                                                                                                                                     |
| Adefovir vs. placebo (64, 74)                                                       | 12-96/18-40  | 2/600 | RD, 0.26 (0.19 to 0.33)*<br>0.791/0%                                                                                     | Moderate                                           | Allocation concealment: unclear (64), adequate (74); double-blinded, intention-to-treat analyses: yes; attrition bias: yes; funding: pharmaceutical                                                                 |
| Interferon- $\alpha$ 2b + corticosteroid vs. interferon- $\alpha$ 2b (38, 123, 124) | 24/24-26     | 3/170 | Random differences in all comparisons                                                                                    | Moderate                                           | Allocation concealment: unclear; partially double-blinded (38), open-label (123, 124), intention-to-treat analyses: yes; attrition bias: yes; funding: government/pharmaceutical (38), not reported (123, 124)      |
| Interferon- $\alpha$ 2b + corticosteroid vs. no treatment (38)                      | 24/24        | 1/87  | RD, 0.25 (0.06 to 0.43)*                                                                                                 | Low                                                | Allocation concealment: unclear; partially double-blinded, pathologist-blinded, intention-to-treat analyses: yes; study withdrawals adequately described: yes; funding: government, pharmaceutical                  |
| Interferon- $\alpha$ 2b + lamivudine vs. interferon- $\alpha$ 2b (79, 81)           | 24-48/4-56   | 2/192 | Random differences in all time of follow-up comparisons, significant increase in RD at the onset 56 wk time of follow-up | Low                                                | Allocation concealment: unclear (81), adequate (79); open-label (79), blinded $\leq$ wk 8 (79) intention-to-treat analyses: no (81), yes (79); attrition bias: yes; funding: not reported (81), pharmaceutical (79) |
| Interferon- $\alpha$ 2b + lamivudine vs. lamivudine (31, 59, 73, 79, 83, 89)        | 24-176/24-96 | 6/751 | RD, 0.03 (-0.03 to 0.08)<br>0.014/58.3%                                                                                  | Moderate. 2 of 6 RCTs reported an increase in rate | Allocation concealment: adequate (31, 59, 73, 79), unclear (83, 89); open-label (31, 59, 73, 83, 89), double blinded (79), intention-to-treat analyses: yes; attrition bias: yes; funding: foundations              |

|                                                                                           |             |       |                                                             |          |                                                                                                                                                                                                                                                      |
|-------------------------------------------------------------------------------------------|-------------|-------|-------------------------------------------------------------|----------|------------------------------------------------------------------------------------------------------------------------------------------------------------------------------------------------------------------------------------------------------|
| Interferon- $\alpha$ 2b + placebo vs. lamivudine (79)                                     | 24/12-40    | 2/151 | Random differences at different time of follow-up           | Low      | (89), pharmaceutical (79), not reported (31, 59, 73, 83)<br>Allocation concealment: adequate; blinded $\leq$ wk 8 pathologist-blinded, intention-to-treat analyses: yes; attrition bias: yes; funding: pharmaceutical                                |
| Interferon- $\alpha$ 2b vs. interferon- $\alpha$ 2b (32, 36, 38)                          | 24-48/24-48 | 3/185 | Random differences at different doses and time of follow-up | Moderate | Allocation concealment: unclear; partially double-blinded (38), open-label (32, 36), intention-to-treat analyses: yes (36, 38), not reported (32); attrition bias: yes; funding: government, pharmaceutical (38), not reported (32), foundation (36) |
| Interferon- $\alpha$ 2b vs. no treatment (33, 38)                                         | 16-24/8-24  | 2/131 | RD, 0.31 (0.17 to 0.44)*<br>0.442/0%                        | Moderate | Allocation concealment: adequate (33), unclear (38); intention-to-treat analyses: yes; attrition bias: yes; funding: not reported (33), government/pharmaceutical (38)                                                                               |
| Lamivudine vs. placebo (60)                                                               | 96/24       | 1/136 | RD, 0.21 (0.04 to 0.38)*                                    | Low      | Allocation concealment: unclear; double-blinded, pathologist-blinded, intention-to-treat analyses: yes; attrition bias: no; funding: pharmaceutical                                                                                                  |
| Pegylated interferon- $\alpha$ 2a + lamivudine vs. lamivudine (49, 69)                    | 48/24       | 2/905 | RD, 0.13 (0.06 to 0.19)*<br>0.569/0%                        | High     | Allocation concealment: unclear; partially double-blinded, intention-to-treat analyses: yes; attrition bias: yes; funding: pharmaceutical                                                                                                            |
| Pegylated interferon- $\alpha$ 2a + lamivudine vs. pegylated interferon- $\alpha$ 2a (49) | 48/24       | 1/542 | RD, -0.02 (-0.10 to 0.06)                                   | Low      | Allocation concealment: unclear; partially double-blinded, intention-to-treat analyses: yes (1 dose required); attrition bias: yes; funding: pharmaceutical                                                                                          |
| Pegylated interferon- $\alpha$ 2a + placebo vs. lamivudine (49, 69)                       | 48/24       | 2/905 | RD, 0.13 (0.07 to 0.20)*<br>0.904/0%                        | High     | Allocation concealment: unclear; partially double-blinded, intention-to-treat analyses: yes; attrition bias: yes; funding: pharmaceutical                                                                                                            |

|                                                                                           |         |        |                                                              |                                                                                                                  |                                                                                                                                                                                  |
|-------------------------------------------------------------------------------------------|---------|--------|--------------------------------------------------------------|------------------------------------------------------------------------------------------------------------------|----------------------------------------------------------------------------------------------------------------------------------------------------------------------------------|
| Pegylated interferon $\alpha$ 2a vs. pegylated interferon- $\alpha$ 2a (125)              | 24/24   | 1/194  | Random differences at all dose comparisons. No dose response | Low. No dose response association of pegylated interferon- $\alpha$ 2a on ALT normalization at time of follow-up | Allocation concealment: unclear; open-label, intention-to-treat analyses: yes; attrition bias: yes; funding: pharmaceutical                                                      |
| Pegylated interferon- $\alpha$ 2b + lamivudine vs. pegylated interferon- $\alpha$ 2b (90) | 52/26   | 1/307  | RD, 0.02 (-0.08 to 0.12)                                     | Low                                                                                                              | Allocation concealment: unclear; double-blinded, intention-to-treat analyses: yes (1 dose); attrition bias: yes; funding: pharmaceutical                                         |
| Peginterferon- $\alpha$ 2b vs. interferon- $\alpha$ 2b (93)                               | 24/24   | 1/230  | RD, -0.01 (-0.13 to 0.11)                                    | Low                                                                                                              | Allocation concealment: adequate; open-label, intention-to-treat analyses: yes; attrition bias: yes; funding: not reported                                                       |
| <b>E. Relapse and mutation</b>                                                            |         |        |                                                              |                                                                                                                  |                                                                                                                                                                                  |
| <b>Relapse end of treatment</b>                                                           |         |        |                                                              |                                                                                                                  |                                                                                                                                                                                  |
| Adefovir vs. placebo (74, 86)                                                             | 48-52/0 | 2/1055 | RD, -0.08 (-0.37 to 0.21)<br>0.000/99%                       | Low                                                                                                              | Allocation concealment: adequate; double-blinded, intention-to-treat analyses: yes; attrition bias: yes; funding: pharmaceutical                                                 |
| Entecavir vs. lamivudine (45, 47)                                                         | 52-96/0 | 2/1347 | RD, -0.01 (-0.11 to 0.09)<br>0/96%                           | Low                                                                                                              | Allocation concealment: unclear; double-blinded, intention-to-treat analyses: yes; attrition bias: yes; funding: pharmaceutical                                                  |
| Interferon- $\alpha$ 2b + lamivudine vs. lamivudine (31, 73, 82, 87)                      | 24-96/0 | 4/326  | RD, -0.06 (-0.16 to 0.04)<br>0.063/59%                       | High                                                                                                             | Allocation concealment: adequate (31, 73, 82), unclear (87); open-label, intention-to-treat analyses: yes (31, 73, 87), unclear (82); attrition bias: yes; funding: not reported |
| Lamivudine (88)                                                                           | 48-60/0 | 1/348  | RD, 0.16 (0.08; to 0.24)*                                    | Low                                                                                                              | Allocation concealment: unclear; double-blind intention-to-treat analyses: no; attrition bias: no; funding: not reported                                                         |
| Lamivudine vs. telbivudine (58)                                                           | 52/0    | 1/63   | RD, 0.11 (-0.06 to 0.29)                                     | Low                                                                                                              | Allocation concealment: unclear; double-blinded, intention-to-treat analyses: yes; attrition bias: yes;                                                                          |

|                                                                               |               |       |                                                                         |                                                                                       |                                                                                                                                                                                 |
|-------------------------------------------------------------------------------|---------------|-------|-------------------------------------------------------------------------|---------------------------------------------------------------------------------------|---------------------------------------------------------------------------------------------------------------------------------------------------------------------------------|
| Pegylated interferon- $\alpha$ 2b + amivudine vs. lamivudine (78)             | 60/0          | 1/100 | Random differences for virologic and biochemical outcomes               | Low                                                                                   | funding: pharmaceutical<br>Allocation concealment: adequate; open-label, pathologist-blinded, intention-to-treat analyses: yes (1 dose required); attrition bias: yes           |
| Telbivudine + lamivudine vs. lamivudine (58)                                  | 52/0          | 1/60  | RD, -0.04 (-0.23 to 0.16)                                               | Low                                                                                   | Allocation concealment: unclear; double-blinded, intention-to-treat analyses: yes; attrition bias: yes; funding: pharmaceutical                                                 |
| Telbivudine + lamivudine vs. telbivudine (58)                                 | 52/0          | 1/85  | RD, 0.08 (-0.04 to 0.19)                                                | Low                                                                                   | Allocation concealment: unclear; double-blinded, intention-to-treat analyses: yes; attrition bias: yes; funding: pharmaceutical                                                 |
| <b>Relapse at follow-up</b>                                                   |               |       |                                                                         |                                                                                       |                                                                                                                                                                                 |
| Entecavir vs. lamivudine (44)                                                 | 52/24         | 1/709 | RD, -0.16 (-0.20 to -0.12)*                                             | Low                                                                                   | Allocation concealment: unclear; double-blinded, pathologist-blinded, intention-to-treat analyses: yes; attrition bias: yes; funding: pharmaceutical                            |
| Interferon- $\alpha$ 2b + corticosteroid vs. interferon- $\alpha$ 2b (38, 51) | 24/24         | 2/141 | Random differences for all comparisons                                  | Low                                                                                   | Allocation concealment: unclear; partially double-blinded, intention-to-treat analyses: yes; attrition bias: yes; funding: pharmaceutical (51), government, pharmaceutical (38) |
| Interferon- $\alpha$ 2b + corticosteroid vs. no treatment (38)                | 24/24         | 1/87  | RD, 0.02 (-0.04 to 0.08)                                                | Low                                                                                   | Allocation concealment: unclear; partially double-blinded, intention-to-treat analyses: yes; attrition bias: yes; funding: government/pharmaceutical                            |
| Interferon- $\alpha$ 2b + lamivudine vs. lamivudine (59, 83)                  | 52-176/24-192 | 2/158 | Random differences in all but at 96 and 144 wk of follow-up comparisons | Low. One RCT reported a significant decrease in relapse at wk 96 and 144 of follow-up | Allocation concealment: unclear (83), adequate (59); open-label, intention-to-treat analyses: yes; attrition bias: yes; funding: not reported                                   |
| Interferon- $\alpha$ 2b vs. interferon- $\alpha$ 2b (38)                      | 24/24         | 1/82  | RD, -0.02 (-0.09 to 0.04)                                               | Low. No differences between 5 or 1 MU/d of interferon- $\alpha$ 2b on                 | Allocation concealment: unclear; partially double-blinded, intention-to-treat analyses: yes; attrition bias: yes;                                                               |

|                                                                               |             |       |                                                                            |                                                                                                                                                                                                                              |                                                                                                                                                                                                                                                               |
|-------------------------------------------------------------------------------|-------------|-------|----------------------------------------------------------------------------|------------------------------------------------------------------------------------------------------------------------------------------------------------------------------------------------------------------------------|---------------------------------------------------------------------------------------------------------------------------------------------------------------------------------------------------------------------------------------------------------------|
| Interferon- $\alpha$ 2b vs. no treatment (34, 35, 38, 54)                     | 16-96/20-96 | 4/378 | Random differences for all comparisons                                     | relapse at follow-up<br>High                                                                                                                                                                                                 | funding: government, pharmaceutical<br>Allocation concealment: unclear (34, 38, 54), adequate (35); open-label, intention-to-treat analyses: yes; attrition bias: yes; funding: pharmaceutical (35).<br>government/pharmaceutical (38), not reported (34, 54) |
| Pegylated interferon- $\alpha$ 2b + lamivudine vs. lamivudine (50)            | 52-60/24-72 | 1/100 | Random differences for all time of follow-up comparisons (0.00; 0.00) (RD) | Low                                                                                                                                                                                                                          | Allocation concealment: adequate; open-label, intention-to-treat analyses: yes (1 dose required); attrition bias: yes; funding: pharmaceutical                                                                                                                |
| <b>Mutation end of treatment</b>                                              |             |       |                                                                            |                                                                                                                                                                                                                              |                                                                                                                                                                                                                                                               |
| Adefovir + lamivudine vs. lamivudine (71)                                     | 52/0        | 1/95  | RD, -0.33 (-0.50 to -0.17)* RD, 0.04 (-0.03 to 0.11)                       | Low                                                                                                                                                                                                                          | Allocation concealment: unclear; double-blinded, intention-to-treat analyses: yes (1 dose); attrition bias: yes; funding: not reported                                                                                                                        |
| Adefovir vs. adefovir (42)                                                    | 114-240/0   | 1/250 | RD, 0.18 (0.08 to 0.27)* RD, 0.12 (0.04 to 0.20)*                          | Low. Adefovir for 240 vs. 114 wk increased rates of adefovir resistant mutation                                                                                                                                              | Allocation concealment: unclear; double-blinded, intention-to-treat analyses: yes; attrition bias: not reported funding: pharmaceutical                                                                                                                       |
| Adefovir vs. placebo (63,86)                                                  | 48/0        | 2/879 | Random differences for all but 1 amino acid substitution rt221Y            | Low. Adefovir dipivoxil vs. placebo increased rates of emerging amino acid substitutions in the HBV-RT domain and rates of rt221Y amino acid substitution but not rt134D; rt219A; rt91I; rt134N; rt54H; rt145M substitutions | Allocation concealment: unclear; double-blinded, intention-to-treat analyses: yes; attrition bias: not reported funding: pharmaceutical                                                                                                                       |
| Interferon- $\alpha$ 2b + lamivudine vs. lamivudine (31) (59, 73, 80, 87, 89) | 24-96/0     | 6/721 | RD, -0.18 (-0.35 to -0.01)* 0/91% RR 0.42 (0.16 to 1.09)*                  | Moderate                                                                                                                                                                                                                     | Allocation concealment: unclear (87, 89), adequate (31, 59, 73, 80); open-label (31, 59, 73, 87, 89), double-                                                                                                                                                 |

0.003/72.2%

blinded (80), intention-to-treat analyses: yes; attrition bias: yes; funding: not reported (59, 73, 87) pharmaceutical/government/other (80), foundations (89)

|                                                                                           |          |        |                                                      |      |                                                                                                                                                                                               |
|-------------------------------------------------------------------------------------------|----------|--------|------------------------------------------------------|------|-----------------------------------------------------------------------------------------------------------------------------------------------------------------------------------------------|
| Interferon- $\alpha$ 2b + lamivudine vs. placebo (80)                                     | 52/0     | 1/118  | RD, 0.00 (-0.03 to 0.03)                             | Low  | Allocation concealment: yes; double-blinded until wk 8 (IFN assigned), pathologist-blinded, intention-to-treat analyses: yes; attrition bias: yes; funding: pharmaceutical/government/other   |
| Lamivudine for 60 wk vs. lamivudine for 48 wk (88)                                        | 48-60/0  | 1 /429 | RD, 0.06 (0.01 to 0.11)*<br>RD, 0.03 (0.00 to 0.06)* | Low  | Allocation concealment: unclear; double-blind intention-to-treat analyses: no; attrition bias: no; funding: not reported                                                                      |
| Lamivudine vs. placebo (41, 80)                                                           | 52-130/0 | 2/826  | RD, 0.43 (0.38 to 0.48)*<br>0.873/0%                 | High | Allocation concealment: unclear (41), adequate (80); double-blinded, intention-to-treat analyses: yes; attrition bias: no; funding: pharmaceutical (41), pharmaceutical/government/other (80) |
| Pegylated interferon- $\alpha$ 2a + lamivudine vs. lamivudine (49)                        | 48/0     | 1/543  | RD, -0.22 (-0.28 to -0.16)*                          | Low  | Allocation concealment: unclear; partially double-blinded, pathologist-blinded, intention-to-treat analyses: yes (1 dose required); attrition bias: yes; funding: pharmaceutical              |
| Pegylated interferon- $\alpha$ 2a + lamivudine vs. pegylated interferon- $\alpha$ 2a (49) | 48/0     | 1/542  | RD, 0.03 (0.01 to 0.06)*                             | Low  | Allocation concealment: unclear; partially double-blinded, pathologist-blinded, intention-to-treat analyses: yes (1 dose required); attrition bias: yes; funding: pharmaceutical              |
| Pegylated interferon- $\alpha$ 2a + placebo vs. lamivudine (49)                           | 48/0     | 1/543  | RD, -0.25 (-0.31 to -0.20)*                          | Low  | Allocation concealment: unclear; partially double-blinded, pathologist-blinded, intention-to-treat analyses: yes (1 dose required); attrition bias: yes; funding: pharmaceutical              |
| Pegylated interferon- $\alpha$ 2b +                                                       | 60/0     | 1/100  | RD, -0.18 (-0.35 to -                                | Low  | Allocation concealment: adequate;                                                                                                                                                             |

|                                                                                           |       |       |                                                               |                                                                  |  |                                                                                                                                                               |
|-------------------------------------------------------------------------------------------|-------|-------|---------------------------------------------------------------|------------------------------------------------------------------|--|---------------------------------------------------------------------------------------------------------------------------------------------------------------|
| lamivudine vs. lamivudine (78)                                                            |       |       | 0.01)*                                                        |                                                                  |  | open-label, pathologist-blinded, intention-to-treat analyses: yes (1 dose required); attrition bias: yes                                                      |
| Pegylated interferon- $\alpha$ 2b + lamivudine vs. pegylated interferon- $\alpha$ 2b (90) | 52/0  | 1/307 | RD, 0.09 (0.04 to 0.14)*                                      | Low                                                              |  | Allocation concealment: unclear; double-blinded, pathologist-blinded, intention-to-treat analyses: yes (1 dose); attrition bias: yes; funding: pharmaceutical |
| <b>Follow-up</b>                                                                          |       |       |                                                               |                                                                  |  |                                                                                                                                                               |
| Adefovir for 96 vs. 48 wk (64)                                                            | 96/18 | 1/140 | Random differences in all mutations and duration of treatment | Low. No differences in mutations after adefovir for 96 vs. 48 wk |  | Allocation concealment: unclear; double-blinded, intention-to-treat analyses: yes; attrition bias: not reported funding: pharmaceutical                       |
| Adefovir vs. placebo (64)                                                                 | 96/18 | 1/140 | Random differences in all mutations and duration of treatment | Low                                                              |  | Allocation concealment: unclear; double-blinded, intention-to-treat analyses: yes; attrition bias: not reported funding: pharmaceutical                       |
| Interferon- $\alpha$ 2b + lamivudine vs. interferon- $\alpha$ 2b (79)                     | 24/28 | 1/144 | RD, 0.00 (-0.03 to 0.03)                                      | Low                                                              |  | Allocation concealment: adequate; blinded $\leq$ wk 8 pathologist-blinded, intention-to-treat analyses: yes; attrition bias: yes; funding: pharmaceutical     |
| Interferon- $\alpha$ 2b + lamivudine vs. lamivudine (79)                                  | 24/28 | 1/157 | RD, -0.23 (-0.32 to -0.14)*                                   | Low                                                              |  | Allocation concealment: adequate; blinded $\leq$ wk 8 pathologist-blinded, intention-to-treat analyses: yes; attrition bias: yes; funding: pharmaceutical     |
| Interferon- $\alpha$ 2b + placebo vs. lamivudine (79)                                     | 24/28 | 1/151 | RD, -0.23 (-0.33 to -0.14)*                                   | Low                                                              |  | Allocation concealment: adequate; blinded $\leq$ wk 8, pathologist-blinded, intention-to-treat analyses: yes; attrition bias: yes; funding: pharmaceutical    |
