# Supplementary material
Source: HighWire-hosted journal article supplement (https://www.annals.org/content/suppl/2009/01/05/0000605-200901200-00101)
Supplement: Shamliyan_AT2_150-2-DC1-A1.pdf [file Shamliyan_AT2_150-2-DC1-A1.pdf]

**Appendix Table 2. Randomized, Controlled Trial of Participants Who Withdrew from Treatment and had AEs**

| AE                                                                     | Studies, n | Treatment, n/n (%)          | Control Participants, n/n (%) | Absolute Risk Difference (95% CI) | Relative Risk Ratio (95% CI) | Trial(s) Duration |
|------------------------------------------------------------------------|------------|-----------------------------|-------------------------------|-----------------------------------|------------------------------|-------------------|
| <b>Versus Placebo (63, 69)</b>                                         |            |                             |                               |                                   |                              |                   |
| Participants not completing study/treatment                            | 1          | 26/345 (7.5) (10 and 30 mg) | 13/170 (7.6)                  | 0 (-5 to 5)                       | 0.99 (0.52 to 1.87)          | 48 wk             |
| Any AE                                                                 | 1          | 94/123 (76.4)               | 45/61 (73.7)                  | 3 (-11 to 16)                     | 1.04 (0.87 to 1.24)          | 48 wk             |
| Severe AE (grade III or IV)                                            | 2          | 24/294 (8.2)                | 19/228 (8.3)                  | 0 (-6 to 6)                       | 0.95 (0.45 to 2.01)          | 48 wk             |
| AEs leading to discontinuation of study drug                           | 2          | 4/294 (1.4)                 | 1/228 (<1)                    | 1 (-1 to 3)                       | 2.34 (0.37 to 14.75)         | 48 wk             |
| <b>Versus lamivudine, participants with lamivudine resistance (72)</b> |            |                             |                               |                                   |                              |                   |
| Participants not completing study/treatment                            | 1          | 1/20 (5)                    | 1/19 (5.3)                    | 0 (-14 to 14)                     | 0.95 (0.06 to 14.13)         | 48 wk             |
| Any AE                                                                 | 1          | 18/19 (94.7)                | 19/19 (100)                   | -5 (-19 to 8)                     | 0.95 (0.82 to 1.09)          | 48 wk             |
| Serious AE                                                             | 1          | 3/19 (15.8)                 | 1/19 (5.3)                    | 11 (-9 to 30)                     | 3.0 (0.34 to 26.3)           | 48 wk             |
| AEs leading to discontinuation of study drug                           | 1          | 0/19                        | 0/19                          | 0                                 | –                            | 48 wk             |
| <b>Versus telbivudine (74)</b>                                         |            |                             |                               |                                   |                              |                   |
| Participants not completing study/treatment                            | 1          | 2/45 (4.4)                  | 2/45 (4.4)                    | 0 (-9 to 9)                       | 1.00 (0.13 to 7.43)          | 52 wk             |
| Any AE                                                                 | 1          | 27/44 (61.4)                | 34/45 (75.6)                  | -14 (-33 to 5)                    | 0.81 (0.61 to 1.08)          | 52 wk             |
| AE leading to discontinuation of study drug                            | 1          | 0/44                        | 0/45                          | 0                                 | –                            | 52 wk             |
| <b>B. Lamivudine monotherapy</b>                                       |            |                             |                               |                                   |                              |                   |
| <b>Versus Placebo (60, 67, 68)</b>                                     |            |                             |                               |                                   |                              |                   |
| Participants not completing study/treatment                            | 2          | 33/374 (8.8)                | 16/120 (13.3)                 | -1 (-7 to 4)                      | 0.87 (0.51 to 1.49)          | 52-104 wk         |
| Any AE                                                                 | 1          | 224/285 (78.6)              | 56/73 (76.7)                  | 2 (-9 to 13)                      | 1.02 (0.89 to 1.18)          | 52 wk             |
| Serious AE                                                             | 2          | 18/374 (4.8)                | 6/120 (5)                     | 2 (-1 to 4)                       | 1.24 (0.53 to 2.93)          | 52-104 wk         |
| <b>Versus placebo, participants refractory interferon therapy (80)</b> |            |                             |                               |                                   |                              |                   |
| Participants not completing study/treatment                            | 1          | 9/119 (7.6)                 | 10/56 (17.9)                  | -10 (-21 to 1)                    | 0.42 (0.18 to 0.98)          | 68 wk             |
| AE leading to discontinuation of study drug                            | 1          | 1/119 (<1)                  | 4/56 (7.1)                    | -6 (-13 to 1)                     | 0.12 (0.01 to 1.03)          | 68 wk             |
| <b>Versus placebo, participants with advanced liver disease (41)</b>   |            |                             |                               |                                   |                              |                   |
| Any AE                                                                 | 1          | 335/436 (76.8)              | 178/215 (82.8)                | -6 (-12 to 0)                     | 0.93 (0.86 to 1.01)          | 32 mo (median)    |

|                                                                |   |                   |                   |                  |                     |                   |
|----------------------------------------------------------------|---|-------------------|-------------------|------------------|---------------------|-------------------|
| Serious AE                                                     | 1 | 54/436<br>(12.4)  | 38/215<br>(17.7)  | -5 (-11 to 1)    | 0.70 (0.48 to 1.03) | 32 mo<br>(median) |
| Versus Pegylated Interferon- $\alpha$ -2a monotherapy (49, 69) |   |                   |                   |                  |                     |                   |
| Participants not completing treatment/study                    | 2 | 71/456<br>(15.6)  | 45/453<br>(9.9)   | 6 (1 to 10)      | 1.57 (1.10 to 2.22) | 72 wk             |
| Any AE                                                         | 2 | 238/453<br>(52.5) | 395/448<br>(88.2) | -36 (-43 to -29) | 0.59 (0.51 to 0.69) | 72 wk             |
| Serious AE                                                     | 2 | 10/453<br>(2.2)   | 21/448<br>(4.7)   | -2 (-5 to 0)     | 0.47 (0.22 to 0.99) | 72 wk             |
| AE leading to discontinuation of study drug                    | 2 | 2/453 (<1)        | 21/448<br>(4.7)   | -5 (-10 to 1)    | 0.13 (0.20 to 0.90) | 72 wk             |
| Dose modification due to AE                                    | 2 | 0/453             | 33/448<br>(7.4)   | -7 (-10 to -5)   | 0.03 (0.00 to 0.22) | 72 wk             |

### C. Telbivudine monotherapy

Versus Adefovir (see above)

Versus lamivudine, attributed to study drug (SEBIVO INSERT – 007 GLOBE) (77)

|                                                               |   |                   |                    |              |                      |       |
|---------------------------------------------------------------|---|-------------------|--------------------|--------------|----------------------|-------|
| Participants not completing treatment/study                   | 1 | 18/680<br>(2.6)   | 32/687<br>(4.7)    | -2 (-4 to 0) | 0.57 (0.32 to 1.00)  | 52 wk |
| Any AE                                                        | – | NR                | NR                 | –            | –                    | 52 wk |
| Serious AE                                                    | 1 | 18/680<br>(2.6)   | 33/687<br>(4.8)    | -2 (-4 to 0) | 0.55 (0.31 to 0.97)  | 52 wk |
| AE leading to discontinuation of study drug                   | 1 | 2/680 (<1)        | 5/687 (<1)         | 0 (-1 to 0)  | 0.40 (0.08 to 2.08)  | 52 wk |
| AE leading to discontinuation, possibly related to study drug | 1 | 1/680<br>myopathy | 1/687<br>urticaria | 0 (0 to 0)   | 1.01 (0.06 to 16.12) | 52 wk |

### D. Entecavir monotherapy (acyclic guanosine derivative)

0.5-mg dose vs. lamivudine, nucleoside-naive participants (44, 45)

|                                                                                                               |   |                   |                   |              |                     |                                                     |
|---------------------------------------------------------------------------------------------------------------|---|-------------------|-------------------|--------------|---------------------|-----------------------------------------------------|
| Participants not completing study/treatment                                                                   | 2 | 37/688<br>(5.4)   | 58/675<br>(8.6)   | -3 (-8 to 2) | 0.64 (0.33 to 1.26) | Entecavir<br>56-75 wk<br>lamivudin<br>e56-65 wk     |
| Any AE                                                                                                        | 2 | 552/679<br>(80.3) | 545/668<br>(81.1) | 0 (-6 to 6)  | 1.00 (0.92 to 1.08) | Entecavir<br>56-75 wk<br>lamivudin<br>e 56-65<br>wk |
| Serious AE                                                                                                    | 2 | 48/679<br>(7.1)   | 54/668<br>(8.1)   | -1 (-4 to 2) | 0.88 (0.60 to 1.27) | Entecavir<br>56-75 wk<br>lamivudin<br>e56-65 wk     |
| AE leading to discontinuation of study drug                                                                   | 2 | 7/679 (1.0)       | 18/668<br>(2.7)   | -2 (-3 to 0) | 0.33 (0.06 to 1.86) | Entecavir<br>56-75 wk<br>lamivudin<br>e56-65 wk     |
| 0.5-mg dose vs. lamivudine, nucleoside-naive participants (patient information sheet [Bristol Myers Squibb])† |   |                   |                   |              |                     |                                                     |
| Any Grade 2-4 AE                                                                                              | 1 | 102/679<br>(15)   | 120/668<br>(18)   | -3 (-7 to 1) | 0.84 (0.66 to 1.06) | Through 2<br>y                                      |

1-mg dose vs. lamivudine in lamivudine-refractory participants (patient information sheet [Bristol Myers Squibb])†

|                                                                  |   |                   |                   |                |                     |             |
|------------------------------------------------------------------|---|-------------------|-------------------|----------------|---------------------|-------------|
| Any Grade 2-4 AE                                                 | 2 | 40/183<br>(21.9)  | 44/190<br>(23.2)  | -1 (-10 to 7)  | 0.94 (0.87 to 1.14) | Through 2 y |
| Versus lamivudine in lamivudine-refractory participants (43, 46) |   |                   |                   |                |                     |             |
| Participants not completing study/treatment (48 wks)             | 2 | 39/283<br>(13.9)  | 38/191<br>(19.9)  | -12 (-30 to 6) | 0.54 (0.36 to 0.81) | 48 wk       |
| AE leading to discontinuation of study drug                      | 2 | 11/277<br>(4.0)   | 14/190<br>(7.4)   | -5 (-9 to 1)   | 0.43 (0.12 to 1.54) | 48 wk       |
| Any AE                                                           | 2 | 225/277<br>(81.2) | 155/190<br>(81.6) | 0 (-12 to 11)  | 0.99 (0.87 to 1.14) | 48 wk       |
| Serious AE                                                       | 2 | 22/277<br>(7.9)   | 14/190<br>(7.4)   | 1 (-4 to 6)    | 1.18 (0.62 to 2.27) | 48 wk       |

### E. Pegylated interferon- $\alpha$ 2a monotherapy (see lamivudine section)

### F. Combination pegylated interferon- $\alpha$ 2a and lamivudine therapy

Versus lamivudine (see above) (49, 69)

Versus pegylated interferon- $\alpha$ 2a monotherapy (49, 69)

|                                             |   |                   |                   |              |                     |       |
|---------------------------------------------|---|-------------------|-------------------|--------------|---------------------|-------|
| Participants not completing treatment/study | 2 | 49/457<br>(10.7)  | 45/453<br>(9.9)   | 1 (-4 to 5)  | 1.08 (0.71 to 1.66) | 72 wk |
| Any AE                                      | 2 | 395/450<br>(87.8) | 395/448<br>(88.2) | 0 (-58 to 4) | 1.00 (0.95 to 1.05) | 72 wk |
| Serious AE                                  | 2 | 28/450<br>(6.2)   | 21/448<br>(4.7)   | 2 (-1 to 4)  | 1.33 (0.77 to 2.30) | 72 wk |
| AE leading to discontinuation of study drug | 2 | 19/450<br>(4.2)   | 21/448<br>(4.7)   | -1 (-6 to 4) | 0.90 (0.33 to 2.48) | 72 wk |

### G. Combination Pegylated interferon- $\alpha$ -2b and Lamivudine therapy (Interferon)

Versus pegylated interferon- $\alpha$ 2b monotherapy (90)

|                                             |   |                                           |                  |              |                     |       |
|---------------------------------------------|---|-------------------------------------------|------------------|--------------|---------------------|-------|
| Participants not completing treatment/study | 1 | 38/152 (25)                               | 37/155<br>(23.9) | 1 (-8 to 11) | 1.05 (0.71 to 1.55) | 78 wk |
| Serious AE                                  | 1 | 32 total, 17 probably related to therapy. |                  |              |                     | 78 wk |
| AE leading to discontinuation of study drug | 1 | 12/152<br>(7.9)                           | 11/155<br>(7.1)  | 1 (-5 to 7)  | 1.11 (0.51 to 2.44) | 78 wk |

### I. Pegylated interferon- $\alpha$ 2b versus interferon- $\alpha$ 2b (93)

|                                             |                                                                                                             |             |                  |                 |                     |       |
|---------------------------------------------|-------------------------------------------------------------------------------------------------------------|-------------|------------------|-----------------|---------------------|-------|
| Participants not completing treatment/study | 1                                                                                                           | 7/115 (6.1) | 20/115<br>(17.4) | -11 (-19 to -3) | 0.35 (0.15 to 0.80) | 72 wk |
| AE leading to discontinuation of study drug | 1                                                                                                           | 0/115       | 4/115 (3.5)      | -3 (-7 to 0)    | 0.11 (0.01 to 2.04) | 72 wk |
| Any AE                                      | 75% of patients in each treatment group experienced various clinical forms of drug-related adverse effects. |             |                  |                 |                     | 72 wk |

### K. Interferon- $\alpha$ -2b monotherapy (interferon)

Prolonged (32 wk) versus standard (16 wk) duration (35)

Dose reduction due to AE: 11.5% (7/61) in the prolonged group; not reported in standard group.

AE leading to discontinuation of study drug: 4.9% (3/61) in the prolonged group; not reported in standard group.

Phase A: all participants before randomly assigned: dose modification due to AE: 16/162 (10%).

Versus no treatment (reference)

(36) 6 mo ( $n = 19$ ) vs. 12 mo ( $n = 19$ ). Treatment was well tolerated by all participants who finished the study, and no dose modification was needed.

(40) IFN ( $n = 20$ ) vs. no treatment ( $n = 20$ ). Study duration was 68 wks. 4 IFN and 5 NT participants did not complete study.

(55) IFN ( $n = 30$ ) vs. no treatment ( $n = 28$ ). Study duration was 10 mo. One participant with a preexisting depressive state converted to overt depression and was taken off treatment.

(32) IFN ( $n = 25$ ) vs. no treatment ( $n = 25$ ). Study duration was 52 wks. IFN therapy well tolerated. No serious AE observed.

AE = adverse events; ALT = alanine aminotransferase; HBeAg = hepatitis B e antigen; HBsAg = hepatitis B surface antigen; HBV = hepatitis virus B; IFN = interferon therapy; MU = million units; NT = no treatment; NS = statistically nonsignificant; RCT = randomized, controlled trial; RD = risk difference; RR = relative risk;

\* Statistically significant at 95% level

† New York, New York.
